# 1 Intrinsic DNA topology as a prioritization metric in genomic fine-mapping studies.

2 Hannah C. Ainsworth,<sup>1\*</sup> Timothy D. Howard,<sup>2</sup> and Carl D. Langefeld<sup>1\*\*</sup>

3 <sup>1</sup>Department of Biostatistics and Data Science, Wake Forest School of Medicine, Winston-Salem, NC,  
4 27157, USA.

5 <sup>2</sup>Department of Biochemistry, Wake Forest School of Medicine, Winston-Salem, NC, 27157, USA.

6 \*Correspondence: hainswor@wakehealth.edu

7 \*\*Correspondence: clangefe@wakehealth.edu

8

9

10

## 11 Graphical Abstract

12 We hypothesize that SNPs imposing dissimilar minor groove width profiles ( $\Delta$ MGW) are  
13 more likely to alter function.  $\Delta$ MGW was interrogated genome-wide and then used as a  
14 weighting metric for fine-mapping associations.

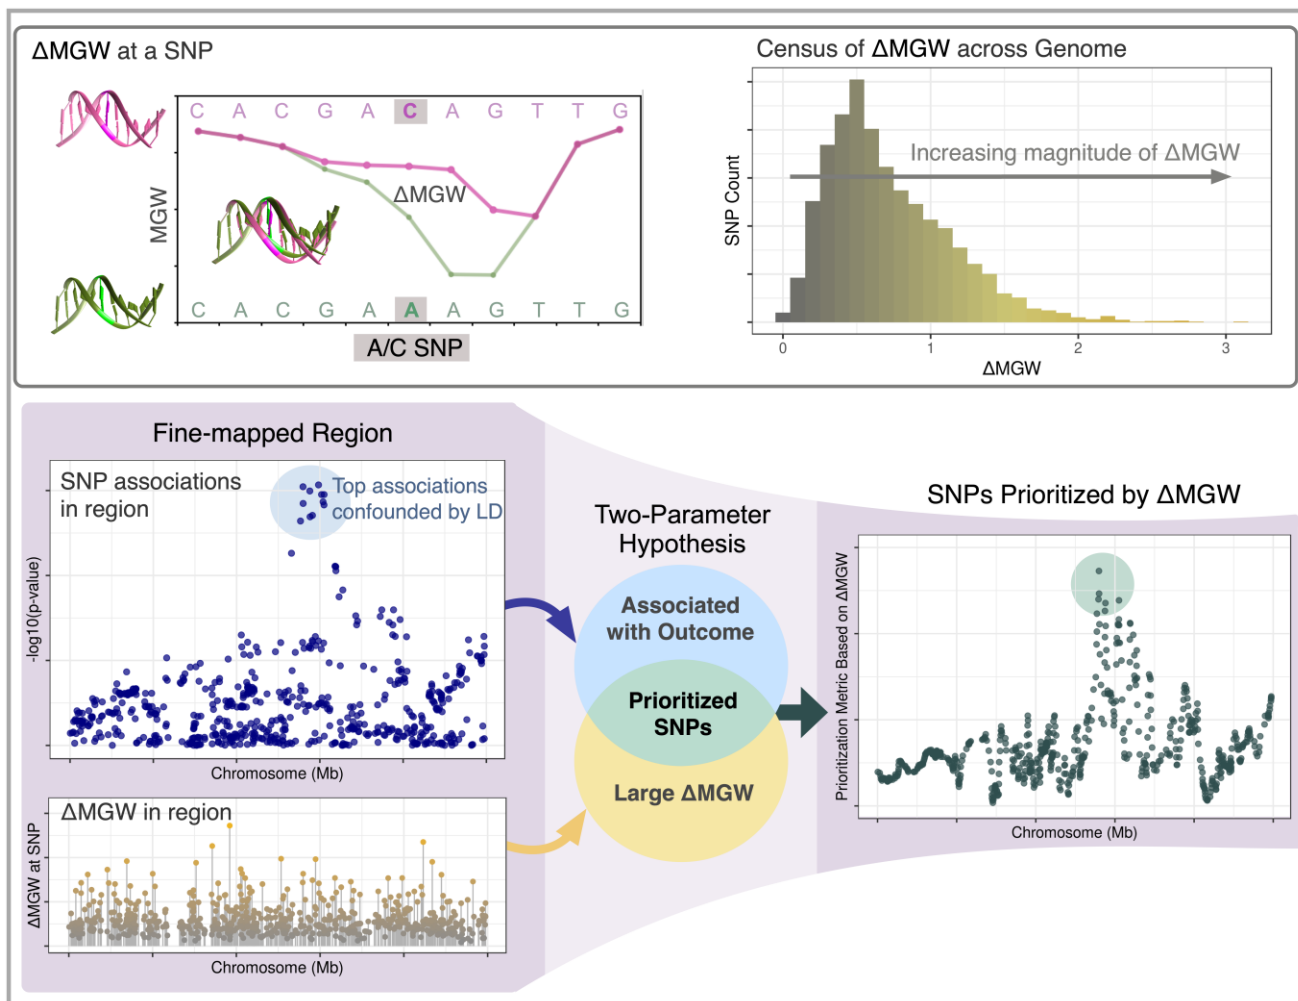

15

16 **Abstract**

17           In genomic fine-mapping studies, some approaches leverage annotation data to  
18 prioritize likely functional polymorphisms. However, existing annotation sources often present  
19 challenges as many: lack data for novel variants, offer no context for noncoding regions, and/or  
20 are confounded with linkage disequilibrium. We propose a novel annotation source – sequence-  
21 dependent DNA topology – as a prioritization metric for fine-mapping. DNA topology and  
22 function are well-intertwined, and as an intrinsic DNA property, it is readily applicable to any  
23 genomic region. Here, we constructed and applied, Minor Groove Width (MGW), as a  
24 prioritization metric. Using an established MGW-prediction method, we generated an MGW  
25 census for 199,038,197 SNPs across the human genome. Summarizing a SNP's change in  
26 MGW ( $\Delta$ MGW) as a Euclidean distance,  $\Delta$ MGW exhibited a strongly right-skewed distribution,  
27 highlighting the infrequency of SNPs that generate dissimilar shape profiles. We hypothesized  
28 that phenotypically-associated SNPs can be prioritized by  $\Delta$ MGW. We applied Bayesian and  
29 frequentist MGW-prioritization approaches to three non-coding regions associated with System  
30 Lupus Erythematosus in multiple ancestries. In two regions, including  $\Delta$ MGW resolved the  
31 association to a single, trans-ancestral, SNP, corroborated by external functional data.  
32 Together, this study presents the first usage of sequence-dependent DNA topology as a  
33 prioritization metric in genomic association studies.

34

## 35 **Introduction**

36 Genetic association studies have successfully identified thousands of loci associated  
37 with a broad range of phenotypes.(1) However, despite the abundance of these genomic  
38 associations, analytic challenges have largely hindered identification of the specific genomic  
39 drivers of disease.(2–4) First, linkage disequilibrium (LD) constitutes a major analytic challenge,  
40 as highly correlated variants exhibit comparable evidence of association, making it difficult to  
41 statistically isolate causal polymorphisms. Second, many associated single nucleotide  
42 polymorphisms (SNPs) reside in non-coding regions, occluding functional relevance without  
43 additional context and information. Even with increased sample sizes and variant coverage,  
44 these challenges remain.(2–5) In-depth functional analyses are not practical for a large number  
45 of variants, and thus, there remains the need to effectively prioritize the most likely causal  
46 variants for follow-up studies and approaches (e.g. CRISPR).

47 To prioritize potential causal variants, association results can be weighted by external  
48 functional information (e.g. histone modifications, eQTL status, transcription factor binding  
49 sites).(5–8) This approach has been successful in reducing and refining associated variants,  
50 and there are a growing number of tools and methods that integrate external data with genomic  
51 association studies.(6, 9–13) Nevertheless, such methods are not without limitations.  
52 Importantly, the choice of annotation and database bias are strong factors for consideration as  
53 missing or incomplete functional data could result in down-weighting potentially causal  
54 polymorphisms. These challenges particularly arise for regions with no (presently) known  
55 functional implications. Additionally, many annotation resources are based on European data;  
56 and thus may offer limited information for genetic studies in non-European individuals (e.g.  
57 novel regions).(14, 15) Such limitations can reduce the rate of progress in understanding the  
58 functional impact of ancestry-specific associations and perpetuate health disparities.(16, 17) To  
59 alleviate some of these biases imposed by external datasets, we propose a prioritization

60 approach that leverages information intrinsic to the DNA itself, sequence-dependent DNA  
61 topology.

62 From chromatin conformation to selective protein binding,(18–26) DNA is a highly  
63 dynamic macromolecule with structure inherently linked to function. Sequence-dependent DNA  
64 topology (or shape) refers to the geometric parameters (measured in Angstroms or degrees)  
65 between successive nucleotides in a DNA sequence.(24, 27–29) The sequence dependency of  
66 these spatial measures (**Figure 1**) has been well-studied and in recent years, increasingly  
67 connected to various functional implications, including protein binding, DNA stability, and  
68 methylation.(18, 20, 21, 23, 30–38) High-throughput DNA shape prediction methods now  
69 enable exploration of DNA topology on a genome-wide scale, and thus, provide new  
70 opportunities in association studies.(24, 39)

71 This study presents using sequence-dependent DNA topology as a prioritization metric  
72 in genomic association studies. Here, we focused on minor groove width (MGW), which  
73 measures the distance (Angstroms, Å) between the sugar phosphate backbone of the forward  
74 and reverse strands. For each SNP, we analyzed its change in minor groove width ( $\Delta$ MGW) to  
75 evaluate whether the SNP's alleles created similar or divergent MGW profiles. MGW has been  
76 implicated in numerous protein binding studies and used in transcription factor binding  
77 prediction algorithms.(18, 20, 24, 32, 34, 36, 37, 40, 41) Recently it was studied in the context of  
78 purifying selection, where “shape disrupting variants” (examples shown in **Figures 2** and **3**) tend  
79 to be less common in functional regions (shape-preserving polymorphisms being more  
80 frequent).(42) Thus, we proposed that if a phenotypically-associated SNP also yields a large  
81  $\Delta$ MGW, it is more likely to be causal as a function of divergent shape profiles.

82 We specifically hypothesized that highly correlated SNPs in a phenotype-associated  
83 region can be functionally prioritized using each SNP's magnitude of  $\Delta$ MGW. We evaluated this  
84 hypothesis in three stages. First, using an established MGW-prediction algorithm(39), we

85 generated the complete sample space for  $\Delta$ MGW for all possible input sequences. Second, we  
86 evaluated the observed frequency of  $\Delta$ MGW across the human genome using bi-allelic SNPs in  
87 the dbSNP SNP150 dataset. Third, we tested this approach by prioritizing SNPs in three  
88 genomic regions previously associated with systemic lupus erythematosus (SLE)(43) leveraging  
89 both frequentist and Bayesian association methods.

## 90 **Methods and Materials**

91

### 92 **Calculation of $\Delta$ MGW for a bi-allelic SNP.**

93 The predicted MGW for a given sequence was obtained using the DNashapeR package  
94 (<https://bioconductor.org/packages/release/bioc/html/DNashapeR.html>) , available through  
95 Bioconductor.(39) DNashapeR calculates DNA features using Monte Carlo simulations for  
96 nucleotide structure based on DNA sequence fragments. DNA feature predictions are based on  
97 a rolling window of five nucleotides for a given n-length sequence. For this study, to capture the  
98 MGW at a SNP, we used the four flanking (up and downstream) nucleotides (9-mer sequence)  
99 as input. Each bi-allelic SNP produces two unique 9-mer sequences (one sequence for each  
100 allele) and thus, both of a SNP's sequences were submitted to DNashapeR to obtain the  
101 corresponding feature vectors for MGW. The MGW was retained for the nucleotide at the SNP's  
102 position as well as +/- 1 nucleotides. Capturing MGW for additional bases would require longer  
103 input sequences, which could introduce additional variability (e.g. SNPs within the flanking  
104 sequence). The  $\Delta$ MGW was calculated as a Euclidean distance for the SNP and +/- 1 base  
105 **(Figure 2).**

### 106 **Generation of $\Delta$ MGW sample space**

107 To calculate the entire sample space for  $\Delta$ MGW, we generated a dataset of all possible  
108 input sequences. Since our goal was to evaluate the  $\Delta$ MGW at a SNP with +/- 4 base pairs,  
109 input sequences required nine nucleotides. Thus, all possible combinations of Adenine,  
110 Cytosine, Guanine, and Thymine, generated 262,144 9-mer sequences. From this dataset, all

111 possible bi-allelic pairings (A/C, A/G, A/T, C/G, C/T, G/T) were created on the 5<sup>th</sup> nucleotide of  
112 each sequence (“SNP position”) while holding the flanking nucleotides constant, generating  
113 393,216 9-mer pairings. These 9-mer pairings represent every possible sequence combination  
114 that could be observed for a bi-allelic SNP (**Figure 3**). These paired sequences were evaluated  
115 for  $\Delta$ MGW using the previously described method.

## 116 **Visualization of DNA sequences**

117 DNA shape measures, provided by DNashapeR, were submitted as a parameter file to  
118 the 3D-Dart webportal (<http://milou.science.uu.nl/services/3DDART/>) for a ‘BDNA nucleic acid’.  
119 (44) Resulting pdb files from 3D-Dart were then visualized using Chimera  
120 (<https://www.cgl.ucsf.edu/chimera/>). (45)

## 121 **Curating dbSNPs150 database**

122 The NCBI hg19 dbSNPs150 data file (snp150.txt.gz) was downloaded via UCSC  
123 GoldenPath ([hgdownload.cse.ucsc.edu](http://hgdownload.cse.ucsc.edu)) on July 6, 2018. (46) Insertion-deletions, tri-allelic,  
124 quad- allelic, and multiple nucleotide polymorphisms were excluded. Retained bi-allelic SNPs  
125 were limited to those located on chromosomes 1-22 and X. Any SNPs that were labeled with  
126 “Unusual Conditions” as defined by UCSC were excluded, as these indicate possible  
127 discrepancies among alleles and/or potential mapping issues (e.g. SNP flanking sequence  
128 aligns to more than one location in the reference assembly). (46, 47) The pruned bi-allelic  
129 dataset contained 199,038,272 SNPs.

130 For dbSNP 150 data, each SNP’s flanking sequence of four nucleotides was retrieved  
131 from the Human Reference Genome (downloaded October 2017) (48) using SAMTOOLS. For  
132 each SNP, the dbSNP “Strand” variable was used to inform if the alleles reported by dbSNP  
133 aligned with the reference genome. All SNPs were successfully queried against the reference  
134 genome. There were 75 SNPs that contained at least one flanking base encoded as “N” (any

135 base) and were excluded from summarizations, leaving a final dataset of 199,038,197 SNPs.

136 The  $\Delta$ MGW for these sequences were obtained as described above.

137

### 138 **SLE ImmunoChip Data for fine-mapping analyses**

139 Genomic data for fine-mapping analyses came from the published trans-ancestral SLE  
140 ImmunoChip study; genotype calling and genomic quality control methods were previously  
141 described.(43) This data includes three ancestries, European Ancestry (EA), African Ancestry  
142 (AA), and Hispanic Ancestry (HA), with large case-control counts: EA (6,748; 11,516), AA  
143 (2,970; 2,452), and HA (1,872; 2,016).

144 Genomic regions were named for the genes in physical proximity to the region of  
145 association. Non-HLA genomic regions were selected for fine-mapping if the region contained  
146 SNPs reaching genome-wide significance ( $p < 5 \times 10^{-8}$ ) in at least two ancestry-specific  
147 analyses.(43) We also limited our analyses to regions where the top associations mapped to  
148 non-coding regions (e.g. introns, intergenic), where we hypothesize DNA topology might  
149 provide novel insight to the fine-mapping analyses. Genomic regions containing *FAM167A-BLK*  
150 (8p23), *STAT4* (2q32), and *TNIP1* (5q33) met these criteria. Quality controlled genomic data for  
151 these regions were extracted using a 250 kb window around the previously reported top  
152 association from the ImmunoChip analysis.(43)

153 SNPs from the selected genomic regions were queried against the human reference  
154 genome to retrieve the four flanking bases. Each SNP's strand information (based on Illumina  
155 Infinium ImmunoChip documentation) was utilized to ensure that the corresponding alleles  
156 appropriately aligned with the reference genome.

### 157 **Statistical Analyses.**

158 Single-SNP associations. Single-SNP associations were previously reported and  
159 described in the transancestral SLE ImmunoChip study.(43)

160            SKAT analyses. The previous single-SNP logistic regression analyses (43) did not  
161 incorporate SNP-specific weights/information. Thus, SNPs in high LD yielded comparable  
162 association values. The Sequence Kernel Association Test (SKAT) is a regression approach  
163 that was designed to handle covariates and SNP-specific weights through a weighted linear  
164 kernel.(49) It was shown that well-selected SNP weights can yield better statistical power (e.g.  
165 increasing weight of functional variants).(49) SKAT was originally developed to leverage minor  
166 allele frequency (MAF), as the weighting scheme in rare variant studies; however, the SKAT  
167 framework is a general method that can accommodate any user-specified SNP weights.(49)  
168 Here, we used  $\Delta$ MGW as the weighting scheme. A variation of SKAT is the Optimal unified test  
169 which combines both SKAT and the burden test (SKAT-O).(12) The SKAT-O test statistic is a  
170 weighted average of the SKAT and burden test statistics and can be beneficial when applying to  
171 genomic regions where one test may be better powered than another.(50) Primary advantages  
172 of burden tests occur when a large number of variants are causal and for smaller sample sizes  
173 (SKAT loses power in small sample sizes, <2000 cases and controls). Generally, burden tests  
174 do not perform as well as SKAT when a large proportion of the variants are non-causal.(12, 49,  
175 50) In this study, our datasets are large (AA: 5,422; EA: 18,264; HA: 2,016), and we expect  
176 many of the highly associated SNPs in LD to be non-causal; thus, in this scenario we selected  
177 SKAT to be more appropriate, which is consistent with published power calculations and  
178 simulations.(12, 49, 50) SKAT was applied to genomic regions through its implementation in  
179 the R package, SKAT (<https://CRAN.R-project.org/package=SKAT>). For each genomic region,  
180 the model parameters and residuals were calculated for SKAT using SKAT\_Null\_Model() for a  
181 dichotomous outcome (case/controls status) and previously described (43) population-specific  
182 factors (to account for admixture). Since all datasets (AA, EA, and HA) had a sample size  
183 greater than 2,000 cases and controls, no small-sample adjustment was applied. Within each  
184 genomic region, adjacent 5-SNP windows were generated, offset by 1 SNP. Each window was  
185 evaluated using the SKATbinary() with method=SKAT and a linear-weighted kernel with SNPs



186 weighted by their  $\Delta$ MGW. To evaluate consistency of the results (e.g. for SNPs outside of the  
187 main peak of association), genomic regions were also evaluated using equal-weighting for all  
188 SNPs. Given the small window size ( $n=5$  SNPs), we expect a large proportion of each window  
189 to contain non-causal SNPs, further supporting our selection of SKAT. For comparison, we also  
190 applied SKAT-O but noted minimal differences on the final outcome. To localize the top  
191 association signals to each SNP, SNP-window p-values were treated as a SNP prioritization  
192 metric by generating the geometric mean of  $-\log_{10}(p\text{-values})$  across windows containing each  
193 SNP. That is, the prioritization metric was calculated using the p-value for each SKAT analysis  
194 window ( $p_i$ ) that contained the  $k^{\text{th}}$  SNP ( $n$  analysis windows). With the exception of the first and  
195 last five SNPs in a region, each  $\text{SNP}_k$  was included in five analysis windows ( $n=5$ ). Thus, for  
196 each SNP  $k$ , we calculated its prioritization metric as:

$$\text{Prioritization Metric } \text{SNP}_k = -\log_{10} \left( \prod_{i=1}^n p_i \right)^{\frac{1}{n}} \quad (\text{Equation 1})$$

198 Bayesian Approach: Credible SNP Sets. Frequentist approaches, such as those  
199 implemented SKAT or single-SNP logistic regression analyses are widely utilized; however,  
200 their resulting p-values are not without limitations.(51) For one, p-values do not capture the  
201 confidence of a particular association. Furthermore, they're more dependent on factors such as  
202 the power of the statistical test (influenced by sample size and other variables). Bayesian  
203 methods offer an alternative approach; here, Bayes factors are used, capturing the ratio of  
204 probabilities between the null and alternative hypotheses.

205 As a comparison to the frequentist approaches, we used SNPTEST to generate the  
206 Bayes factors (BF), using the score test and additive genotype modeling.(52) Posterior  
207 probabilities for a given SNP  $k$ , were then calculated using method published by the Welcome

208 Trust Case Control Consortium.(53) For SNPs 1-j in the region, the posterior probability for each  
209 SNP  $k$ , was calculated by:

$$\text{Posterior Probability for SNP}_k = \frac{\text{BF}_k}{\sum_j \text{BF}_j} \quad \text{(Equation 2)}$$

211 Using these posterior probabilities, the 95% credible set was determined for each region. This  
212 test assumes only one causal SNP in the region and places equal *a priori* probabilities that the  
213 causal SNP is any one of the analyzed SNPs.(53) In this study, we applied this method to  
214 previously defined regions (43) where we hypothesized the association signal is driven by one  
215 SNP.

216 Like the single-SNP logistic regression analyses, this Bayesian analysis is not weighted  
217 by functional data. Thus, for a  $\Delta\text{MGW}$ -weighted analysis, a derived credible set was generated  
218 from posterior probabilities that accounted for each SNP's  $\Delta\text{MGW}$  through *ad hoc* weighting,  
219 where the posterior probability for a given SNP  $k$ , was calculated by weighting the Bayes factor  
220 by  $\Delta\text{MGW}_k$  divided by the weighted average of Bayes factors for SNPs 1-j in the region. Here,  
221 the derived posterior probability for each SNP  $k$ , is:

$$\text{Derived Posterior Probability for SNP}_k = \frac{\text{BF}_k \Delta\text{MGW}_k}{\sum_j \text{BF}_j \Delta\text{MGW}_j} \quad \text{(Equation 3)}$$

223 Using these values, the derived 95% credible SNP sets were generated and compared with the  
224 unweighted 95% credible SNP sets. This methodology enabled weighting by a continuous  
225 variable versus existing methods designed for dichotomous (presence/absence of functional  
226 annotation) SNP weights.(54)

## 227 **Functional Annotation**

228 To evaluate the functional plausibility for an identified variant, several publically available  
229 resources were referenced. For variant associations with gene expression (eQTL status), the  
230 Genotype-Tissue Expression (GTEx) dataset, version 7 (hg19) was queried at  
231 [gtexportal.org](http://gtexportal.org).(55) GTEx is a comprehensive eQTL resource, providing eQTL information  
232 across 48 tissues. SNPs were also queried using the SCREEN (Search Candidate cis-  
233 Regulatory Elements by Encode, <http://screen.encodeproject.org>). (56, 57) Built using Encode  
234 data, SCREEN (hg19) evaluates if a given genomic coordinate resides in a Candidate cis-  
235 Regulatory Element (ccRE). ccREs are designated based on evidence from DNase  
236 hypersensitivity sites, H3K4me3 and H3K27ac histone activity, and CTCF-binding data.  
237 SCREEN contains 1.31 million ccREs, correlating to 20.8% of the mappable human genome  
238 (<http://screen.encodeproject.org>). Genomic variants were also evaluated for evidence of long-  
239 range DNA interaction via Hi-C data (hg19) available through the Yue Lab 3D Genome Browser  
240 (<http://promoter.bx.psu.edu/hi-c/>). (58) Similar to the ccRE search, SNPs were queried to see if  
241 they resided in a genome region that exhibited long-range chromatin interactions. The Yue  
242 Lab's Capture Hi-C data offers information across 19 cell line options. We evaluated immune-  
243 related cell types: naïve B-Cells, CD4\_Total (CD4 activated and Naïve), CD8 naïve, monocytes,  
244 and neutrophils.

## 245 Results

246

247 ***For  $\Delta$ MGW, SNPs in the human genome exhibit a stronger right skewed distribution in***  
248 ***comparison to the complete sample space.***

249 In the complete sample space of  $\Delta$ MGW,  $\Delta$ MGW values ranged from 0.00 to 3.16 Å, with  
250 a mean of 0.77 Å and a standard deviation of 0.42. **(Table 1)** The overall data exhibited a right-  
251 skewed distribution **(Figure 3)** with few sequences inducing large changes in MGW.  
252 Unsurprisingly, given the sequence-dependency of this topological measure, parsing the data

253 by the paired alleles (fifth nucleotide, see Methods and Materials), revealed allele-specific  
254 patterns of  $\Delta$ MGW (**Table 1**). Transition pairings (A/G and C/T) yielded the smallest changes in  
255  $\Delta$ MGW, while transversion pairings (Purine/Pyrimidine) produced the largest changes in  $\Delta$ MGW.  
256 Subsets that represent complimentary allele pairs (i.e. A/G & T/C; A/C & T/G) yielded the same  
257  $\Delta$ MGW values. (**Table 1**) Of all allele-pairings, A/T alleles presented the largest  $\Delta$ MGW with a  
258 mean of 1.16 Å (SD, 0.47) (**Figure 3**).

259 We compared the  $\Delta$ MGW sample space statistics to the observed frequencies of  $\Delta$ MGW  
260 across the human genome using dbSNP data. The hg19 download of NCBI dbSNP150  
261 contained 234,104,110 entries. After pruning to high quality (see Methods and Materials), bi-  
262 allelic SNPs, 199,038,197 polymorphisms remained. For these SNPs, there was an average  
263  $\Delta$ MGW of 0.68 Å with a standard deviation of 0.43. In comparison to the  $\Delta$ MGW sample space,  
264 SNPs across the genome exhibited a stronger, right-skewed distribution of  $\Delta$ MGW. (**Figure 3**).  
265 Transition SNPs are more likely to occur (59, 60), and this is consistent with our SNP150  
266 summarizations, where transition SNPs comprised 66.43% of the dataset (**Table S1**). Our  
267  $\Delta$ MGW sample space summarization showed that transition allele pairings had the smallest  
268 change in  $\Delta$ MGW (**Table 1**); thus, the decreased average in  $\Delta$ MGW dbSNP data is expected  
269 and illustrates the high prevalence shape-preserving SNPs in the genome. To evaluate patterns  
270 in  $\Delta$ MGW by SNP function (i.e. missense, intron, coding-synonymous), SNPs with a single  
271 NCBI-designation (see Methods and Materials) were subset and summarized (**Table 2, Figure**  
272 **4**). Notably, some SNP categories are limited to specific sequence combinations(61) (i.e. stop-  
273 loss, **Table S2**), which were reflected in the SNP-function-specific patterns of  $\Delta$ MGW. (**Figure**  
274 **4**) Coding-synonymous SNPs exhibited the smallest overall change in  $\Delta$ MGW (mean=0.48 Å).  
275 Unknown and intron SNPs, which are not constrained to specific sequences (by definition),  
276 comprised the two largest categories ( $n_{\text{unknown}}=99,004,130$ ;  $n_{\text{intron}}=84,909,115$ ) and yielded high  
277 averages for  $\Delta$ MGW: 0.69 Å and 0.56 Å, respectively.

278 ***Fine-mapping SLE-associated genomic regions using  $\Delta$ MGW prioritization identifies***  
279 ***potentially functional SNPs.***

280 To-date, more than 100 genomic loci have been associated with SLE.(43, 62) Here, we  
281 selected the genomic regions containing *FAM167A-BLK*, *STAT4*, and *TNIP1* for fine-mapping  
282 because these regions showed robust single-SNP associations ( $p < 5 \times 10^{-8}$ ) with SLE in at least  
283 two ancestries (*FAM167A-BLK*: EA and AA; *STAT4*: EA and HA; *TNIP1*: EA and HA) and the  
284 association signals are not refined to a single SNP, due in part to strong linkage disequilibrium.  
285 Furthermore, neither the SNPs nor their LD proxies are protein-coding variants, leaving DNA  
286 topology as a potential functional mechanism. For each region, we first describe the previous  
287 SNP association results (43) and their LD patterns, by ancestry. Each region is then  
288 summarized by its  $\Delta$ MGW measures which were used in frequentist and Bayesian  $\Delta$ MGW-  
289 weighted analyses. SNPs identified by the  $\Delta$ MGW-weighted analyses were subsequently  
290 investigated for existing functional evidence (See Methods and Materials).

291 ***FAM167A-BLK.***

292 The SLE-associated region at 8p23 lies upstream of *FAM167A* and *BLK*, which are in a  
293 head-to-head gene orientation. Across the 500kb candidate region, 835 and 933 genotyped  
294 SNPs passed quality control in the EA and AA data, respectively. In the previous(43) logistic  
295 regression analyses, the primary peak of association was captured by a 60 kb window. In EA,  
296 the most significant SNP associations mapped to a 26 kb region of 16 SNPs in high LD ( $r^2 > 0.8$ );  
297 within the AA data, the top associations were refined to a smaller 14 kb window containing 7  
298 highly correlated SNPs (**Figure 5**).The summary statistics for  $\Delta$ MGW for SNPs in the 500 kb  
299 and 60 kb regions were comparable to what was observed across the genome, with only a few  
300 SNPs imposing large changes in MGW (**Table S3**).

301 Hypothesizing that plausibly functional SNPs can be identified by incorporating both  
302  $\Delta$ MGW and evidence for disease association, we applied two  $\Delta$ MGW-weighted approaches via  
303 SKAT and Bayesian credible sets. For the 500 kb region, SKAT was applied in a 5-SNP rolling  
304 window (see Methods and Materials). Across the region, SNPs with the highest SKAT-weighted  
305 prioritizations largely followed the pattern observed in the single-SNP logistic regression  
306 analyses. That is, SNPs that were not previously associated with SLE were not prioritized solely  
307 on  $\Delta$ MGW, as illustrated in the region outside of the 40 kb peak of association (**Figure 5**). When  
308 weighted by  $\Delta$ MGW, rs2061831 was sharply prioritized in both the EA and AA analyses (**Figure**  
309 **5**). In EA, rs2061831 was one of the 14 highly correlated SNPs identified by the single-SNP  
310 logistic regression analyses; likewise, in AA, it was also within the LD block comprising the 7  
311 most highly associated SNPs. While the other SNPs in these LD blocks exhibited comparable  
312 SLE-association, rs2061831 had the greatest  $\Delta$ MGW at 1.63 Å, prioritizing it above other SNPs  
313 in the weighted analyses. Importantly, while the single-SNP logistic regression analyses  
314 identified a different top SNP in EA (rs13277113) and AA (rs2736440),  $\Delta$ MGW-weighting  
315 prioritized the same SNP (rs2061831), across ancestries. An unweighted SKAT prioritized the  
316 signal downstream of rs2061831, to the region where multiple SNPs from the same highly-  
317 associated LD block were included in the same 5-SNP windows (**Figure S1, Tables S4-S5**).

318 The  $\Delta$ MGW-weighted frequentist fine-mapping evidence for rs2061831 was  
319 corroborated using the Bayesian refinement approach. In both EA and AA, the derived  $\Delta$ MGW-  
320 weighted credible set placed the highest posterior probability on rs2061831 (58.9%-EA; 44.2%-  
321 AA) (**Figure 5**). In the un-weighted (standard) Bayesian analysis, rs2061831 was included in the  
322 EA (30.6% posterior probability) and AA (20.9% posterior probability) 95% credible sets, but it  
323 was not the highest prioritized (**Table S4-S5**). Instead, the SNPs originally identified in the  
324 ancestry-specific logistic regression analyses were given the highest posterior probability—EA:  
325 rs13277113 (49.9% posterior probability), AA: rs2736340 (33.1%). Thus, like the frequentist

326 approach, weighting by  $\Delta$ MGW resolved the signal in both EA and AA to the same SNP,  
327 rs2061831.

328 Using  $\Delta$ MGW as a prioritization metric, rs2061831 was consistently prioritized in both  
329 EA and AA data. SNP rs2061831 has a  $\Delta$ MGW of 1.63 Å, which is 2 standard deviations above  
330 the mean across dbSNP150. Interestingly, this SNP is a transition polymorphism  
331 (Purine/Purine), a polymorphism type which we previously showed to have the smallest (on  
332 average)  $\Delta$ MGW (**Table 1, Figure 3**). Considering only transition SNPs, rs2061831 is actually  
333 4.52 standard deviations above the mean  $\Delta$ MGW<sub>transition SNPs</sub> (0.50 Å), indicating a considerable  
334 departure from the expected value and thus we would hypothesize a greater likelihood of  
335 functional relevance. Given the consistent evidence for a signal at rs2061831 in both the EA  
336 and AA data, we explored previously described (see Methods and Materials) functional data  
337 resources for evidence of biological relevance, in comparison to the top SNP signals from the  
338 single-SNP analyses (rs13277113 in EA; and rs2736440 in AA). All three SNPs are in high LD  
339 ( $R^2 > 0.95$ ) with one another in both EUR and AFR 1000 genomes data. Thus, it is unsurprising  
340 that all three SNPs yielded similar eQTL results via GTEx (data not shown). Despite the high  
341 LD, these three SNPs are physically separated by several kilobases. Of these three SNPs,  
342 rs2061831 is the only SNP that maps (via SCREEN) to a Candidate Cis-Regulatory Element  
343 (accession number: EH37E0941109) showing evidence for DNase, H3K27ac, and CTCF-  
344 binding activity. Consulting the 3D-genome browser yielded a larger number of long-range  
345 chromatin interactions in monocytes, B-Cells, and CD4 cells for rs2061831, in comparison to  
346 rs13277113 and rs2736440 (**Figure S2**). Thus, in this region,  $\Delta$ MGW-weighting successfully  
347 differentiated among highly-correlated SNPs and prioritized rs2061831, a SNP within a  
348 potentially important regulatory region as documented by independent data.

349 **STAT4**

350 The single-SNP SLE associations at 2q32 span the *STAT4* gene (**Figure 6**). SNP  
351 associations reached genome significance in the EA and HA cohorts, with the strongest signals  
352 within intronic regions.(43) In the 500 kb region, there were 192 and 202 genotyped SNPs that  
353 passed quality control measures in EA and HA, respectively. In both ancestries, the primary  
354 peak of association was captured by a broad 110 kb window (**Figure 6**). The strongest  
355 associations in the EA data ( $p$ -values  $< 1 \times 10^{-62}$ ) mapped to six SNPs in high LD, spanning 29  
356 kb. Five of these SNPs also comprised the LD block of strongest associations in the HA data  
357 ( $p < 1 \times 10^{-13}$ ), in a slightly narrower 26 kb region. The consistency of SNP association results in  
358 the EA and HA data provided a prime opportunity to test  $\Delta$ MGW-prioritization among highly-  
359 correlated SNPs.

360 The mean  $\Delta$ MGW for SNPs in this region was 0.72 Å in EA and 0.73 Å in HA and both  
361 cohorts had a median  $\Delta$ MGW of 0.56 Å. While these average  $\Delta$ MGW were slightly higher than  
362 what was observed across the entire bi-allelic dbSNP dataset (mean=0.68 Å), the EA and HA  
363 medians were of the same magnitude (dbSNP  $\Delta$ MGW median=0.56). The  $\Delta$ MGW for SNPs  
364 within the 110 kb association window exhibited similar means as the 500 kb region (**Table S6**).

365 We again applied the two  $\Delta$ MGW-weighted approaches using SKAT and Bayesian  
366 credible sets in the region. In EA, the  $\Delta$ MGW-weighted SKAT analyses shifted the top signal  
367 upstream to rs11889341, which markedly increased its priority (**Figure 6**). This SNP was one of  
368 the top six SNPs in the single-SNP association LD-block. While it and the other five SNPs were  
369 all significantly associated with SLE, rs11889341 had the greatest  $\Delta$ MGW at 1.75 Å, which  
370 prioritized it over the other SNPs in the LD block; the remaining SNPs had  $\Delta$ MGW values  
371 ranging from 0.31-1.12 Å (**Figure 6**). In HA, weighting by  $\Delta$ MGW in the SKAT analysis also  
372 prioritized rs11889341 as the top SNP. This SNP was previously identified with the best  $p$ -value  
373 in the single-SNP association analysis, but in the  $\Delta$ MGW-weighted approach, its prioritization  
374 distinctly increased relative to the other SNPs in the LD block (**Figure 6**).



375 In the Bayesian analysis, rs11889341 was included in the EA and HA derived  $\Delta$ MGW-  
376 weighted 95% credible sets (**Figure 6**). In EA, rs11889341 was not in the unweighted 95%  
377 credible set but inclusion of  $\Delta$ MGW increased its posterior probability from 2.4% to 6.0% (**Table**  
378 **S7, Figure S3**). In EA, rs7568275 yielded the strongest signal in both the unweighted (81.0%  
379 posterior probability) and derived  $\Delta$ MGW-weighted (77.3% posterior probability) credible sets  
380 (**Table S7**). This is important to note, as rs7568275 had a much smaller  $\Delta$ MGW (0.66 Å) than  
381 rs11889341 (1.75 Å). This provided an example where the magnitude of the Bayes factor was  
382 so large ( $p=4 \times 10^{68}$ ), that the influence of  $\Delta$ MGW was largely diminished in the analysis.  
383 However, despite the predominant rs7568275 signal, the derived credible set still detected  
384 rs11889341, the SNP identified by the  $\Delta$ MGW-weighted SKAT approach. In the HA data,  
385 rs11889341 yielded the largest posterior probability in the  $\Delta$ MGW-weighted derived credible set.  
386 This SNP also had the largest posterior probability in the unweighted credible set. Unlike the EA  
387 analysis, where the magnitude of the Bayes factor dominated the impact of the  $\Delta$ MGW-  
388 weighting, in the HA data, the  $\Delta$ MGW strongly increased the posterior probability of rs11889341  
389 from 58.6% to 73.5% (**Figure 6, Table S8**). This limited the derived 95% credible set to only 3  
390 SNPs: rs11889341 (73.5%), rs8179673 (16.6%), and rs7574865 (4.8%) (**Table S8**).

391 In the single-SNP association analyses of *STAT4* SNPs, the association signal was  
392 refined to an LD block of 6 SNPs in the EA data and 5 SNPs in the HA dataset. In  $\Delta$ MGW-  
393 weighted analyses, rs11889341 was sharply prioritized over other SNPs in the LD block, with an  
394 exception in the EA  $\Delta$ MGW-weighted derived credible set, where the high magnitude of the  
395 Bayes factor for rs7568275 ( $bf=2.20 \times 10^{64}$ ) over other SNPs ( $bf \leq 1.79 \times 10^{63}$ ) largely negated  
396 any impact of  $\Delta$ MGW in this analysis. Considering the evidence for rs11889341 in the other  
397 three analyses due to its strong combination of SLE association and  $\Delta$ MGW, we would  
398 hypothesize that rs11889341 would be a candidate functional polymorphism. Like rs2061831 in  
399 *FAM167A-BLK*, rs11889341 is also a transition SNP (purine/purine). While transition SNPs are

400 more frequent across the genome (previously shown in Table S1), there are few transition SNPs  
401 (+/- 4 nucleotides) that yield such a high  $\Delta$ MGW (mean  $\Delta$ MGW for transition SNPs=0.50 Å).  
402 Evaluation of publically available functional datasets (see METHODS) yielded limited  
403 information for both rs7568275 and rs11889341. Neither of these SNPs were identified as  
404 eQTLs in GTEx nor were they within Candidate Cis-Regulatory regions (cCREs). Furthermore,  
405 neither variant was shown with long range chromatin interactions in the in the currently available  
406 HI-C data via the 3D genome browser. However, despite the lack of functional information from  
407 these resources, functional evaluation of rs11889341 is available via a 2018 study by Patel and  
408 colleagues, where transancestral mapping identified rs11889341 with strong association with  
409 SLE.(63) In this study, rs11889341 was associated with *STAT1* expression in B-cells through  
410 increased binding of the transcription factor, HMGA1. Given the relationship between  
411 transcription factor binding and DNA topology(20, 31, 32, 64, 65), we hypothesize that the  
412 identified functional activity of rs11889341 (via HMGA1 binding) may be mediated by the large  
413 MGW change imposed by the SNP's alleles.

#### 414 ***TNIP1***

415 Previous single-SNP association analyses(43) identified genome-wide significant  
416 findings ( $p < 5 \times 10^{-8}$ ) in EA and HA data at 5q33 (**Figure 7**). In the 500 kb region, there were 497  
417 and 500 high quality genotyped SNPs in the EA and HA data, respectively. The peak of SLE  
418 association is captured by a 40 kb window which encompasses most of the *TNIP1* gene. In the  
419 EA data, the top associations mapped to three SNPs (rs960709, rs10036748, rs6889239) in  
420 high LD, spanning 3 kb of a *TNIP1* intron. These three SNPs are also encompassed by the  
421 associated LD block in the HA data, where four, highly correlated SNPs (rs1422673, rs960709,  
422 rs10036748, and rs6889239) yielded p-values  $< 5 \times 10^{-8}$ . As completed in the *FAM167A-BLK* and  
423 *STAT4* regions, we again applied  $\Delta$ MGW-weighted fine-mapping strategies to prioritize these  
424 non-coding SLE-associated SNPs.

425 In the *TNIP3* region, the lists of high-quality genotyped SNPs were largely the same  
426 between the EA and HA datasets. Consequently, the statistics for  $\Delta$ MGW in this region were  
427 very similar between the two cohorts. Across the 500 kb window of high quality SNPs, the  
428 average  $\Delta$ MGW was 0.67 Å (median=0.55 Å) in both EA and HA. (**Table S9**) These values  
429 were slightly lower than the observed mean for bi-allelic SNPs from dbSNP (**Table 1**).

430 The SKAT analyses yielded similar results between the EA and HA data. The  $\Delta$ MGW-  
431 weighted analyses did not effectively prioritize or refine the SNP signal. Unlike *FAM167A-BLK*  
432 and *STAT4*,  $\Delta$ MGW-weighting did not resolve the top signal to the same SNP in both  
433 ancestries. Instead, in *TNIP1*, the top SNPs in the  $\Delta$ MGW-weighted analyses for EA  
434 (rs6889239) and HA (rs10036748) were the same as those identified in the single-SNP logistic  
435 regression analysis (**Figure 7**). The SNPs that were prioritized in the unweighted SKAT  
436 analyses were also prioritized in the  $\Delta$ MGW-weighted analyses; notably, in this region  $\Delta$ MGW-  
437 weighting actually dampened the signal because the SNPs with the greatest SLE association  
438 values had low magnitudes of  $\Delta$ MGW (ranging from 0.31-0.37 Å). This pattern was also  
439 observed in the Bayesian approach, where SNPs with the highest posterior probabilities in the  
440 derived credible sets exhibited lower posterior probabilities than in the unweighted credible set  
441 (**Figures 7 and S4 and Tables S10-S11**), again due to the low magnitudes of  $\Delta$ MGW for top-  
442 associated SNPs.

443 In *TNIP1*, the  $\Delta$ MGW-weighted analyses did not differentially prioritize SNPs in  
444 comparison to the unweighted approaches. While there were SNPs with large  $\Delta$ MGW in the  
445 region, these did not have strong SLE-associations. Unlike the *FAM167A-BLK* and *STAT4*  
446 regions, where  $\Delta$ MGW successfully prioritized specific SNPs, this was not achieved in the  
447 *TNIP1* region. This could indicate several possibilities, including:  $\Delta$ MGW may not be a relevant  
448 mechanism for these SNPs, another DNA measure may be more informative, DNA topology  
449 may not be a functional driver for this region, and/or or the functional variant was not included in

450 these analyses. Here, an alternative strategy is required to identify the most plausible functional  
451 polymorphisms.

## 452 **Discussion**

453 Sequence-dependent DNA topology could provide important functional context for  
454 associations, especially for polymorphisms that do not impose protein changes (e.g., coding-  
455 synonymous) and/or variants mapping to non-coding regions. We explored  $\Delta$ MGW, a specific  
456 sequence-dependent measure of DNA topology, as a weighting variable in fine-mapping  
457 analyses. In a sample of 300k SNPs, Wang *et al.* previously found that MGW-preserving SNPs  
458 are more common.(42) Here, we built upon these findings through a full census of bi-allelic  
459 SNPs (n=199,038,197) across the genome. We showed the observed genomic  $\Delta$ MGW was  
460 significantly lower than the complete  $\Delta$ MGW sample space. These findings were consistent with  
461 the relative frequencies of transversion (~33%) and transition (~66%) mutations in the human  
462 genome.(59, 60) We hypothesized that phenotypically-associated SNPs with large  $\Delta$ MGW  
463 would be more likely to impose functional consequences; and thus, proposed  $\Delta$ MGW as a  
464 prioritization metric in fine-mapping studies.

465 We tested our hypothesis using  $\Delta$ MGW weights in two fine-mapping approaches in three  
466 regions (*FAM167A-BLK*, *STAT4*, and *TNIP1*) with well-established SLE associations. In  
467 *FAM167A-BLK* and *STAT4*, we successfully identified SNPs of possible functional  
468 consequence, underscoring  $\Delta$ MGW as a plausibly informative prioritization metric in fine-  
469 mapping studies.

470 There are several advantages to using sequence dependent topology, such as  $\Delta$ MGW, as a  
471 weighting metric in fine-mapping studies. For one, it is an intrinsic variable, inherent to the  
472 genetic sequence surrounding the polymorphism; thus, it is not reliant on external data which  
473 may offer limited information for the SNPs of interest (database bias). As an intrinsic variable it  
474 is also not ancestry specific, tissue specific, or sample size dependent. Limitations in external

475 (non-intrinsic) data may down-weight potentially causal SNPs due to a lack of available  
476 functional data. While publically available functional resources continue to expand, they still  
477 present these challenges, especially for rare or novel variants. This is particularly relevant for  
478 diverse study populations where annotation resources based on European data offer  
479 inadequate or no coverage for regions of interest.(14) For example, Sherman *et al.* presented  
480 deep sequencing in 910 individuals of African descent and found over 296 million base pairs  
481 which were absent in the human reference genome.(15) Novel variants or regions are unlikely  
482 to be annotated by commonly used resources. Therefore, while a SNP's functional relevance  
483 can be supported by public resources, a lack of information does not necessarily indicate a  
484 variant's lack of function. This was illustrated by rs11889341 in *STAT4*, which lacked functional  
485 information from public resources (GTEx, ENCODE, 3D-genome browser)(55, 56, 58), but in a  
486 targeted functional study by Patel *et al.*, rs11889341 was correlated with gene expression and  
487 binding of the transcription factor HMGA1.(63) We identified rs11889341 using  $\Delta$ MGW as the  
488 prioritizing variable. Thus, prioritizing SNPs by a factor intrinsic to DNA may help alleviate some  
489 bias that would otherwise be introduced by missing data from publically available functional  
490 datasets. Consequently, we propose including  $\Delta$ MGW among annotation resources used in  
491 SNP-weighted fine-mapping methods.

492 Changes in DNA topology can potentially impact an array of biological functions such as  
493 transcription factor binding, chromatin remodeling, or methylation.(20, 21, 23, 26, 31, 32, 36)  
494 Likewise, using DNA topology as a SNP prioritization metric does not limit functional information  
495 to a single biological mechanism. This may be especially beneficial when the relationship  
496 between phenotype and biological mechanism is unknown. While functional work in *STAT4*  
497 showed that rs11889341 altered HMGA1 binding, functional work is still needed to evaluate the  
498 rs2061831 genotype in *FAM167A-BLK*. Here, the biological implications of rs2061831 could  
499 involve transcription factor binding, and/or, given its apparent location within a long-range

500 chromatin interaction hotspot (**Figure S1**), chromatin organization. Considering the strong trans-  
501 ancestral signal of rs2061831 across EA and AA, further functional work should explore whether  
502 this SNP acts through an independent functional mechanism or through interactions with other  
503 variants in the region (e.g. within the context of sequence-dependent structural motifs), such as  
504 the insertion-deletion identified in a study of ATAC-seq data in 100 individuals of British  
505 Ancestry.<sup>(66)</sup> Leveraging changes in DNA topology can identify potentially causal  
506 polymorphisms and also generate specific hypotheses for functional follow-up studies.  
507 Furthermore, sequence-dependent DNA topology is a weighting scheme that informatively  
508 decouples SNPs in high LD, a long sought after feature as associations and eQTLs are often  
509 confounded by LD. In *FAM167A-BLK*, we observed comparable eQTL evidence for SNPs in the  
510 associated LD cluster, making eQTL status ineffective at differentiating highly-correlated SNPs.  
511 Instead, consideration of sequence-dependent  $\Delta$ MGW allowed differential prioritization among  
512 these otherwise, highly-correlated SNPs, selecting rs2061831 as a plausible functional  
513 candidate SNP.

514 Another advantage to using local DNA topology in fine-mapping studies is its consistency of  
515 information across ancestries. Assuming identical flanking sequence (e.g., no genomic variant  
516 within +/- 4 bases of the SNP), a SNP's impact on DNA topology would be constant across  
517 ancestries, highlighting the potential utility of DNA topology as a means of resolving association  
518 signals across ancestries. Here, we showed that  $\Delta$ MGW-weighted analyses of *FAM167A-BLK*  
519 and *STAT4* resolved the association signal to the same SNP in each ancestry via the frequentist  
520 approach, followed by largely corroborating evidence via the derived credible sets in the  
521 Bayesian approach. Notably, rs2061831 was not the top-associated SNP in either the ancestry-  
522 specific analyses; however, it was previously identified via the SLE Immunochip trans-ancestral  
523 meta-analysis, where combining association signals across ancestries identified it as the top  
524 SNP.<sup>(43)</sup>

## 525 **Limitations and Future Work**

526           There are several considerations and limitations to using sequence-dependent topology  
527 as a weighting metric in fine-mapping analyses. Notably, some of these limitations could result  
528 in inconclusive and/or insignificant results, as observed in the *TNIP1* region. First, the functional  
529 variants may not have been genotyped or imputed in the study. Analyses that utilize SNP-  
530 specific weights decouple associations from LD. Thus, a weighted metric performs best when  
531 the functional SNP is included in the analysis set. For this reason, we propose application of  
532 this prioritization technique in genomic regions where there is high confidence that the functional  
533 variants have been genotyped or imputed. We note this limitation exists for any statistical  
534 association method.

535           Second, DNA topology, here  $\Delta$ MGW, may not be the mechanism impacting phenotype.  
536 While sequence dependent DNA topology can influence a number of functional factors(18, 21,  
537 23, 24, 32), it is not the only source of biological interactions and could be irrelevant for a  
538 specific phenotype. Thus, when using change in DNA topology, such as  $\Delta$ MGW, in fine-  
539 mapping studies, analyses should be considered in the form of a two-parameter hypothesis – a  
540 combination of association signal and  $\Delta$ MGW. For example, in both the *FAM167A-BLK* and  
541 *STAT4* regions, the highest prioritized SNPs, rs2061831 and rs11889341, did not have the  
542 largest magnitude of  $\Delta$ MGW in the regions (**Figures 5-6**). Instead, these two SNPs were  
543 prioritized by their combined SLE-association and  $\Delta$ MGW.

544           Third, we placed greater weights on SNPs with larger magnitudes of change on DNA  
545 topology. We recognize that even small changes could yield functional consequences. Thus,  
546 future studies should explore weighting SNPs by particular topological profiles (e.g., those  
547 matching binding site profiles). For instance, our *TNIP1* analyses did not show strong signals  
548 when weighting by the magnitude of  $\Delta$ MGW, but this does not definitively rule out MGW as a  
549 functional mechanism (e.g. driven by pattern, not magnitude). The focus on MGW was

550 motivated by the breadth of study on MGW and function.(18, 20, 32, 34, 36) So while this  
551 manuscript considered a single parameter,  $\Delta$ MGW, we are currently expanding to incorporate  
552 additional measures (e.g., helix twist, roll) through multivariate approaches that account for the  
553 correlation structure (dependencies) among spatial measures.

554 Fourth, in this study, we used SKAT and a derived credible sets (Bayesian) approach to  
555 apply a topological weighting scheme to prioritize SNPs; however, we note that there are other  
556 methods that can incorporate weights for SNP association analyses.(10, 67) Here, we assumed  
557 that the majority of variants in the region are non-causal, which is why we selected SKAT over a  
558 combined burden test. However, we note that the results from SKAT and SKAT-O were largely  
559 similar. Similarly, in case of the Bayesian approach applied here, a limitation is its assumption  
560 that a single causal SNP exists in a region, but other Bayesian methods can be explored.(53,  
561 68) In the EA *STAT4* data, the magnitudes of the Bayes factors were so large that weighting by  
562  $\Delta$ MGW yielded minimal impact. Future work should consider approaches to scale weighting  
563 schemes by a constant derived from the magnitude of signal across a genomic region. In the  
564 SKAT approach, for the sliding analysis window, we used five SNPs, which should yield a  
565 region that is neither too wide nor too unstable. Additional testing could potentially improve  
566 optimization of parameters for this analysis. Furthermore, we emphasize that our evaluation of  
567 the SKAT results by summarizing each SNP as the geometric mean of SKAT-analysis p-values  
568 should be regarded as a metric for prioritizing SNPs, not an association analyses, as these  
569 values do not have the statistical properties of a p-value. Overall, these limitations should be  
570 carefully considered when applying these specific methods; but they also highlight opportunities  
571 to further explore the relationship between sequence-dependent DNA topology and phenotype  
572 associations.

573 In summary, weighting SNP associations by functional data can greatly improve  
574 identification of potentially causal SNPs; however, existing annotation resources can negatively



575 affect these outcomes when SNP information is unavailable in public datasets, especially in  
576 non-EA populations.(8, 10, 11, 14) In this study, we presented and tested sequence-dependent  
577 DNA topology as a novel annotation source for genetic fine-mapping studies. As an intrinsic  
578 property, sequence-dependent DNA shape alleviates many of the challenges imposed by  
579 external data resources; and it provides potential functional (testable) context for associations  
580 (e.g. topological disruption for protein binding). Using  $\Delta$ MGW in weighted analyses, we  
581 successfully prioritized functional SNPs in two SLE-associated regions with high LD. Likewise,  
582 as an annotation resource, sequence-dependent DNA topology, such as  $\Delta$ MGW, is readily  
583 applicable in any fine-mapping methods that can incorporate continuous values for SNP  
584 weights. Altogether, this manuscript presents methods that are immediately applicable to  
585 existing genetic data, and it illustrates how sequence-dependent DNA topology can be used as  
586 a paradigm to investigate and understand genetic associations in fine-mapping studies.

587

#### 588 **Funding**

589 This work was supported by the National Institutes of Health [HG007112 -01, U01 NS036695];  
590 and the National Aeronautics and Space Administration [NNX16A069A].

591

#### 592 **Declaration of Interests.**

593 The authors declare no competing interests.

594

#### 595 **Acknowledgements.**

596 We thank M.A. Espeland, M.A. Alexander-Miller, B.I. Freedman, K.D. Zimmerman, M.C.  
597 Marion, and M.E. Comeau for discussions on content and feedback on the work in this paper.  
598 HCA was also supported through the Wake Forest Biomedical Sciences Graduate School.

599 **References.**

- 600 1. MacArthur, J., Bowler, E., Cerezo, M., Gil, L., Hall, P., Hastings, E., Junkins, H., McMahon, A.,  
601 Milano, A., Morales, J., *et al.* (2017) The new NHGRI-EBI Catalog of published genome-  
602 wide association studies (GWAS Catalog). *Nucleic Acids Res.*, **45**, D896–D901.
- 603 2. Visscher, P.M., Brown, M.A., McCarthy, M.I. and Yang, J. (2012) Five years of GWAS  
604 discovery. *Am. J. Hum. Genet.*, **90**, 7–24.
- 605 3. Visscher, P.M., Wray, N.R., Zhang, Q., Sklar, P., McCarthy, M.I., Brown, M.A. and Yang, J. (2017)  
606 10 Years of GWAS Discovery: Biology, Function, and Translation. *Am. J. Hum. Genet.*,  
607 **101**, 5–22.
- 608 4. McCarthy, M.I., Abecasis, G.R., Cardon, L.R., Goldstein, D.B., Little, J., Ioannidis, J.P.A. and  
609 Hirschhorn, J.N. (2008) Genome-wide association studies for complex traits: consensus,  
610 uncertainty and challenges. *Nat. Rev. Genet.*, **9**, 356–369.
- 611 5. Manolio, T.A., Collins, F.S., Cox, N.J., Goldstein, D.B., Hindorf, L.A., Hunter, D.J.,  
612 McCarthy, M.I., Ramos, E.M., Cardon, L.R., Chakravarti, A., *et al.* (2009) Finding the  
613 missing heritability of complex diseases. *Nature*, **461**, 747–753.
- 614 6. Pasaniuc, B. and Price, A.L. (2017) Dissecting the genetics of complex traits using summary  
615 association statistics. *Nat. Rev. Genet.*, **18**, 117–127.
- 616 7. Farh, K.K.-H., Marson, A., Zhu, J., Kleinewietfeld, M., Housley, W.J., Beik, S., Shores, N.,  
617 Whitton, H., Ryan, R.J.H., Shishkin, A.A., *et al.* (2015) Genetic and epigenetic fine  
618 mapping of causal autoimmune disease variants. *Nature*, **518**, 337–343.
- 619 8. Gomez-Cabrero, D., Abugessaisa, I., Maier, D., Teschendorff, A., Merckenschlager, M., Gisel, A.,  
620 Ballestar, E., Bongcam-Rudloff, E., Conesa, A. and Tegnér, J. (2014) Data integration in  
621 the era of omics: current and future challenges. *BMC Syst. Biol.*, **8**, 11.
- 622 9. Faye, L.L., Machiela, M.J., Kraft, P., Bull, S.B. and Sun, L. (2013) Re-Ranking Sequencing  
623 Variants in the Post-GWAS Era for Accurate Causal Variant Identification. *PLOS Genet.*,  
624 **9**, e1003609.
- 625 10. Kichaev, G., Yang, W.-Y., Lindstrom, S., Hormozdiari, F., Eskin, E., Price, A.L., Kraft, P. and  
626 Pasaniuc, B. (2014) Integrating Functional Data to Prioritize Causal Variants in Statistical  
627 Fine-Mapping Studies. *PLOS Genet.*, **10**, e1004722.
- 628 11. Xu, Z. and Taylor, J.A. (2009) SNPinfo: integrating GWAS and candidate gene information  
629 into functional SNP selection for genetic association studies. *Nucleic Acids Res.*, **37**,  
630 W600–W605.
- 631 12. Lee, S., Wu, M.C. and Lin, X. (2012) Optimal tests for rare variant effects in sequencing  
632 association studies. *Biostatistics*, **13**, 762–775.
- 633 13. Nicolae, D.L., Gamazon, E., Zhang, W., Duan, S., Dolan, M.E. and Cox, N.J. (2010) Trait-  
634 Associated SNPs Are More Likely to Be eQTLs: Annotation to Enhance Discovery from  
635 GWAS. *PLOS Genet.*, **6**, e1000888.

- 636 14. Kessler, M.D., Yerges-Armstrong, L., Taub, M.A., Shetty, A.C., Maloney, K., Jeng, L.J.B.,  
637 Ruczinski, I., Levin, A.M., Williams, L.K., Beaty, T.H., *et al.* (2016) Challenges and  
638 disparities in the application of personalized genomic medicine to populations with  
639 African ancestry. *Nat. Commun.*, **7**, 12521.
- 640 15. Sherman, R.M., Forman, J., Antonescu, V., Puiu, D., Daya, M., Rafaels, N., Boorgula, M.P.,  
641 Chavan, S., Vergara, C., Ortega, V.E., *et al.* (2019) Assembly of a pan-genome from deep  
642 sequencing of 910 humans of African descent. *Nat. Genet.*, **51**, 30–35.
- 643 16. Need, A.C. and Goldstein, D.B. (2009) Next generation disparities in human genomics:  
644 concerns and remedies. *Trends Genet. TIG*, **25**, 489–494.
- 645 17. Manrai, A.K., Funke, B.H., Rehm, H.L., Olesen, M.S., Maron, B.A., Szolovits, P.,  
646 Margulies, D.M., Loscalzo, J. and Kohane, I.S. (2016) Genetic Misdiagnoses and the  
647 Potential for Health Disparities. *N. Engl. J. Med.*, **375**, 655–665.
- 648 18. Privalov, P.L., Dragan, A.I., Crane-Robinson, C., Breslauer, K.J., Remeta, D.P. and  
649 Minetti, C.A.S.A. (2007) What Drives Proteins into the Major or Minor Grooves of DNA?  
650 *J. Mol. Biol.*, **365**, 1–9.
- 651 19. Yakovchuk, P., Protozanova, E. and Frank-Kamenetskii, M.D. (2006) Base-stacking and  
652 base-pairing contributions into thermal stability of the DNA double helix. *Nucleic Acids*  
653 *Res.*, **34**, 564–574.
- 654 20. Yang, L., Orenstein, Y., Jolma, A., Yin, Y., Taipale, J., Shamir, R. and Rohs, R. (2017)  
655 Transcription factor family-specific DNA shape readout revealed by quantitative  
656 specificity models. *Mol. Syst. Biol.*, **13**, 910.
- 657 21. Duan, C., Huan, Q., Chen, X., Wu, S., Carey, L.B., He, X. and Qian, W. (2018) Reduced intrinsic  
658 DNA curvature leads to increased mutation rate. *Genome Biol.*, **19**, 132.
- 659 22. Sati, S. and Cavalli, G. (2017) Chromosome conformation capture technologies and their  
660 impact in understanding genome function. *Chromosoma*, **126**, 33–44.
- 661 23. Lazarovici, A., Zhou, T., Shafer, A., Dantas Machado, A.C., Riley, T.R., Sandstrom, R.,  
662 Sabo, P.J., Lu, Y., Rohs, R., Stamatoyannopoulos, J.A., *et al.* (2013) Probing DNA shape  
663 and methylation state on a genomic scale with DNase I. *Proc. Natl. Acad. Sci. U. S. A.*,  
664 **110**, 6376–6381.
- 665 24. Abe, N., Dror, I., Yang, L., Slattery, M., Zhou, T., Bussemaker, H.J., Rohs, R. and Mann, R.S.  
666 (2015) Deconvolving the recognition of DNA shape from sequence. *Cell*, **161**, 307–318.
- 667 25. Bansal, M., Kumar, A. and Yella, V.R. (2014) Role of DNA sequence based structural features  
668 of promoters in transcription initiation and gene expression. *Curr. Opin. Struct. Biol.*, **25**,  
669 77–85.
- 670 26. Parker, S. and Tullius, T.D. (2011) DNA shape, genetic codes, and evolution. *Curr. Opin.*  
671 *Struct. Biol.*
- 672 27. Olson, W.K., Bansal, M., Burley, S.K., Dickerson, R.E., Gerstein, M., Harvey, S.C.,  
673 Heinemann, U., Lu, X.-J., Neidle, S., Shakked, Z., *et al.* (2001) A Standard Reference

- 674 Frame for the Description of Nucleic Acid Base-pair Geometry. *J. Mol. Biol.*, **313**, 229–  
675 237.
- 676 28. Lu,X.-J. and Olson,W.K. (1999) Resolving the discrepancies among nucleic acid  
677 conformational analyses11Edited by I. Tinoco. *J. Mol. Biol.*, **285**, 1563–1575.
- 678 29. Dickerson,R.E. (1989) Definitions and nomenclature of nucleic acid structure components.  
679 *Nucleic Acids Res.*, **17**, 1797–1803.
- 680 30. Rohs,R., West,S.M., Sosinsky,A., Liu,P., Mann,R.S. and Honig,B. (2009) The role of DNA  
681 shape in protein-DNA recognition. *Nature*, **461**, 1248–1253.
- 682 31. Meysman,P., Marchal,K. and Engelen,K. (2012) DNA structural properties in the  
683 classification of genomic transcription regulation elements. *Bioinforma. Biol. Insights*, **6**,  
684 155–168.
- 685 32. Stella,S., Cascio,D. and Johnson,R.C. (2010) The shape of the DNA minor groove directs  
686 binding by the DNA-bending protein Fis. *Genes Dev.*, **24**, 814–826.
- 687 33. Irobalieva,R.N., Fogg,J.M., Catanese,D.J., Catanese,D.J., Sutthibutpong,T., Chen,M.,  
688 Barker,A.K., Ludtke,S.J., Harris,S.A., Schmid,M.F., *et al.* (2015) Structural diversity of  
689 supercoiled DNA. *Nat. Commun.*, **6**, 8440.
- 690 34. Morgunova,E., Yin,Y., Jolma,A., Dave,K., Schmierer,B., Popov,A., Eremina,N., Nilsson,L.  
691 and Taipale,J. (2015) Structural insights into the DNA-binding specificity of E2F family  
692 transcription factors. *Nat. Commun.*, **6**, 10050.
- 693 35. Ngo,T.T.M., Zhang,Q., Zhou,R., Yodh,J.G. and Ha,T. (2015) Asymmetric unwrapping of  
694 nucleosomes under tension directed by DNA local flexibility. *Cell*, **160**, 1135–1144.
- 695 36. Perino,M., van Mierlo,G., Karemaker,I.D., van Genesen,S., Vermeulen,M., Marks,H., van  
696 Heeringen,S.J. and Veenstra,G.J.C. (2018) MTF2 recruits Polycomb Repressive  
697 Complex 2 by helical-shape-selective DNA binding. *Nat. Genet.*, **50**, 1002–1010.
- 698 37. Chen,C. and Pettitt,B.M. (2016) DNA Shape versus Sequence Variations in the Protein  
699 Binding Process. *Biophys. J.*, **110**, 534–544.
- 700 38. Shepherd,J.W., Greenall,R.J., Probert,M.I.J., Noy,A. and Leake,M.C. (2020) The  
701 emergence of sequence-dependent structural motifs in stretched, torsionally constrained  
702 DNA. *Nucleic Acids Res.*, 10.1093/nar/gkz1227.
- 703 39. Chiu,T.-P., Comoglio,F., Zhou,T., Yang,L., Paro,R. and Rohs,R. (2016) DNASHapeR: an  
704 R/Bioconductor package for DNA shape prediction and feature encoding. *Bioinformatics*,  
705 **32**, 1211–1213.
- 706 40. Zhou,T., Shen,N., Yang,L., Abe,N., Horton,J., Mann,R.S., Bussemaker,H.J., Gordân,R. and  
707 Rohs,R. (2015) Quantitative modeling of transcription factor binding specificities using  
708 DNA shape. *Proc. Natl. Acad. Sci.*, **112**, 4654–4659.
- 709 41. Duzdevich,D., Redding,S. and Greene,E. (2014) DNA Dynamics and Single-Molecule  
710 Biology. *Chem. Rev.*, **114**, 3072–3086.

- 711 42. Wang,X., Zhou,T., Wunderlich,Z., Maurano,M.T., DePace,A.H., Nuzhdin,S.V. and Rohs,R.  
712 (2018) Analysis of Genetic Variation Indicates DNA Shape Involvement in Purifying  
713 Selection. *Mol. Biol. Evol.*, **35**, 1958–1967.
- 714 43. Langefeld,C.D., Ainsworth,H.C., Graham,D.S.C., Kelly,J.A., Comeau,M.E., Marion,M.C.,  
715 Howard,T.D., Ramos,P.S., Croker,J.A., Morris,D.L., *et al.* (2017) Transancestral  
716 mapping and genetic load in systemic lupus erythematosus. *Nat. Commun.*, **8**, 16021.
- 717 44. van Dijk,M. and Bonvin,A.M.J.J. (2009) 3D-DART: a DNA structure modelling server.  
718 *Nucleic Acids Res.*, **37**, W235-239.
- 719 45. Pettersen,E.F., Goddard,T.D., Huang,C.C., Couch,G.S., Greenblatt,D.M., Meng,E.C. and  
720 Ferrin,T.E. (2004) UCSF Chimera--a visualization system for exploratory research and  
721 analysis. *J. Comput. Chem.*, **25**, 1605–1612.
- 722 46. Haeussler,M., Zweig,A.S., Tyner,C., Speir,M.L., Rosenbloom,K.R., Raney,B.J., Lee,C.M.,  
723 Lee,B.T., Hinrichs,A.S., Gonzalez,J.N., *et al.* (2019) The UCSC Genome Browser  
724 database: 2019 update. *Nucleic Acids Res.*, **47**, D853–D858.
- 725 47. Karolchik,D., Hinrichs,A.S., Furey,T.S., Roskin,K.M., Sugnet,C.W., Haussler,D. and  
726 Kent,W.J. (2004) The UCSC Table Browser data retrieval tool. *Nucleic Acids Res.*, **32**,  
727 D493–D496.
- 728 48. Lander,E.S., Linton,L.M., Birren,B., Nusbaum,C., Zody,M.C., Baldwin,J., Devon,K.,  
729 Dewar,K., Doyle,M., FitzHugh,W., *et al.* (2001) Initial sequencing and analysis of the  
730 human genome. *Nature*, **409**, 860–921.
- 731 49. Wu,M.C., Lee,S., Cai,T., Li,Y., Boehnke,M. and Lin,X. (2011) Rare-variant association  
732 testing for sequencing data with the sequence kernel association test. *Am. J. Hum.*  
733 *Genet.*, **89**, 82–93.
- 734 50. Lee,S., Emond,M.J., Bamshad,M.J., Barnes,K.C., Rieder,M.J., Nickerson,D.A., NHLBI GO  
735 Exome Sequencing Project—ESP Lung Project Team, Christiani,D.C., Wurfel,M.M. and  
736 Lin,X. (2012) Optimal unified approach for rare-variant association testing with  
737 application to small-sample case-control whole-exome sequencing studies. *Am. J. Hum.*  
738 *Genet.*, **91**, 224–237.
- 739 51. Stephens,M. and Balding,D.J. (2009) Bayesian statistical methods for genetic association  
740 studies. *Nat. Rev. Genet.*, **10**, 681–690.
- 741 52. Marchini,J., Howie,B., Myers,S., McVean,G. and Donnelly,P. (2007) A new multipoint  
742 method for genome-wide association studies by imputation of genotypes. *Nat. Genet.*,  
743 **39**, 906–913.
- 744 53. The Wellcome Trust Case Control Consortium, Maller,J.B., McVean,G., Byrnes,J.,  
745 Vukcevic,D., Palin,K., Su,Z., Howson,J.M.M., Auton,A., Myers,S., *et al.* (2012) Bayesian  
746 refinement of association signals for 14 loci in 3 common diseases. *Nat. Genet.*, **44**,  
747 1294–1301.

- 748 54. Kichaev,G., Roytman,M., Johnson,R., Eskin,E., Lindström,S., Kraft,P. and Pasaniuc,B.  
749 (2017) Improved methods for multi-trait fine mapping of pleiotropic risk loci. *Bioinforma.*  
750 *Oxf. Engl.*, **33**, 248–255.
- 751 55. GTEx Consortium (2015) The Genotype-Tissue Expression (GTEx) pilot analysis:  
752 Multitissue gene regulation in humans. *Science*, **348**, 648–660.
- 753 56. ENCODE Consortium (2004) The ENCODE (ENCyclopedia Of DNA Elements) Project.  
754 *Science*, **306**, 636–640.
- 755 57. ENCODE Project Consortium (2012) An integrated encyclopedia of DNA elements in the  
756 human genome. *Nature*, **489**, 57–74.
- 757 58. Wang,Y., Song,F., Zhang,B., Zhang,L., Xu,J., Kuang,D., Li,D., Choudhary,M.N.K., Li,Y.,  
758 Hu,M., *et al.* (2018) The 3D Genome Browser: a web-based browser for visualizing 3D  
759 genome organization and long-range chromatin interactions. *Genome Biol.*, **19**, 151.
- 760 59. Nachman,M.W. and Crowell,S.L. (2000) Estimate of the mutation rate per nucleotide in  
761 humans. *Genetics*, **156**, 297–304.
- 762 60. Zhao,Z. and Boerwinkle,E. (2002) Neighboring-Nucleotide Effects on Single Nucleotide  
763 Polymorphisms: A Study of 2.6 Million Polymorphisms Across the Human Genome.  
764 *Genome Res.*, **12**, 1679–1686.
- 765 61. Kitts,A., Phan,L., Ward,M. and Holmes,J.B. (2014) The Database of Short Genetic Variation  
766 (dbSNP) National Center for Biotechnology Information (US).
- 767 62. Niewold,T.B. (2015) Advances in Lupus Genetics. *Curr. Opin. Rheumatol.*, **27**, 440–447.
- 768 63. Patel,Z.H., Lu,X., Miller,D., Forney,C.R., Lee,J., Lynch,A., Schroeder,C., Parks,L.,  
769 Magnusen,A.F., Chen,X., *et al.* (2018) A plausibly causal functional lupus-associated  
770 risk variant in the STAT1-STAT4 locus. *Hum. Mol. Genet.*, **27**, 2392–2404.
- 771 64. Parvin,J.D. and Sharp,P.A. (1993) DNA topology and a minimal set of basal factors for  
772 transcription by RNA polymerase II. *Cell*, **73**, 533–540.
- 773 65. Scaffidi,P. and Bianchi,M.E. (2001) Spatially Precise DNA Bending Is an Essential Activity of  
774 the Sox2 Transcription Factor. *J. Biol. Chem.*, **276**, 47296–47302.
- 775 66. Kumasaka,N., Knights,A.J. and Gaffney,D.J. (2019) High-resolution genetic mapping of  
776 putative causal interactions between regions of open chromatin. *Nat. Genet.*, **51**, 128–  
777 137.
- 778 67. Yang,J., Fritsche,L.G., Zhou,X. and Abecasis,G. (2017) A Scalable Bayesian Method for  
779 Integrating Functional Information in Genome-wide Association Studies. *Am. J. Hum.*  
780 *Genet.*, **101**, 404–416.
- 781 68. Jiang,J., Cole,J.B., Freebern,E., Da,Y., VanRaden,P.M. and Ma,L. (2019) Functional  
782 annotation and Bayesian fine-mapping reveals candidate genes for important agronomic  
783 traits in Holstein bulls. *Commun. Biol.*, **2**, 212.

784

785 **Primary Figures and Legends**

786

787 **Figure 1: Single nucleotide substitutions sequence can impose large or small changes**

788 **on local DNA shape, dependent on the flanking sequence.**

789 (A) A single A/C substitution within a sequence generates minimal spatial differences.

790 (B) A single A/C substitution within a sequence imposes large spatial differences

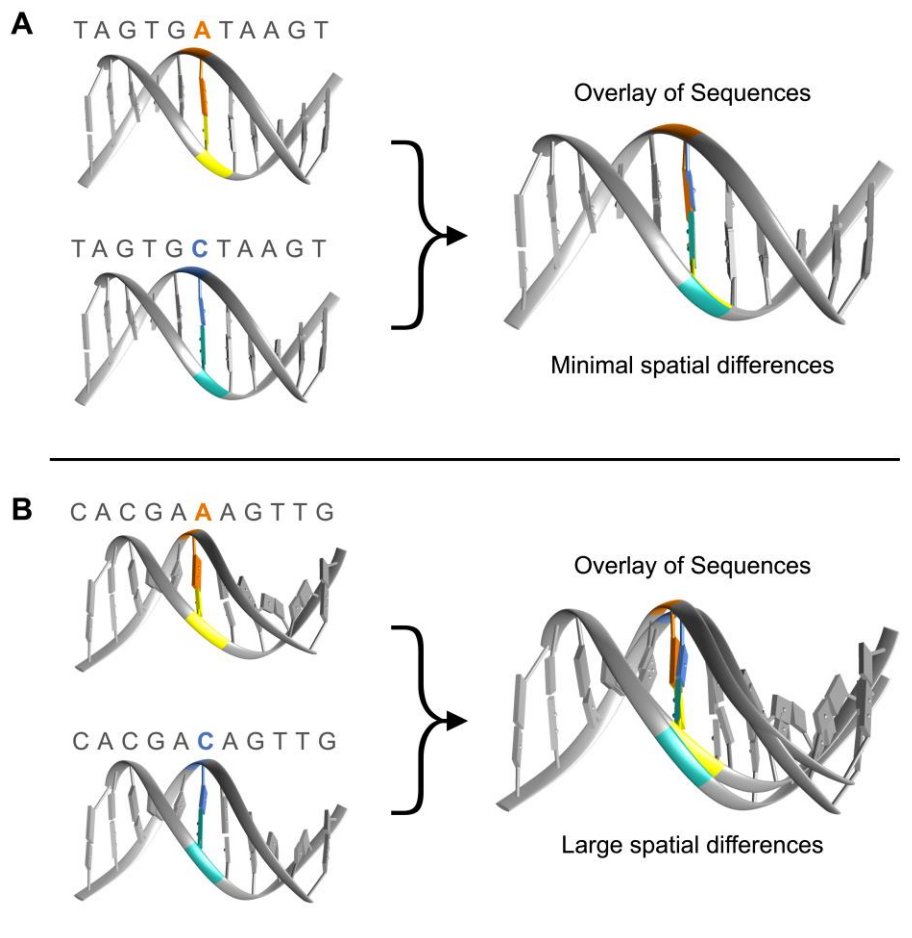

791

792 **Figure 2: Generation of  $\Delta$ MGW for a SNP.**

793 (A) Minor groove width measures are plotted for the two sequences generated by a specific bi-  
794 allelic T/C SNP. For a given SNP, the flanking sequence (+/- 4 bp) was used as input for  
795 DNAsapeR (via Bioconductor) which calculates MGW along a rolling sequence window. For a  
796 9-mer sequence, the MGW can be consistently provided at the SNP's position +/- one  
797 nucleotide which is highlighted in yellow and labeled as the 'region of interest'. Expanding this  
798 region to additional nucleotides would require a longer input sequence and increases chance of  
799 additional variants being within the input (and introducing additional variability). Although the two  
800 sequences for a SNP only differ at one nucleotide (at the SNP position), the impact on MGW  
801 carries through adjacent bases. Thus,  $\Delta$ MGW was calculated to capture the change in MGW for  
802 a SNP by incorporating information at the SNP's position and +/- 1 base pair (dashed lines).

803 (B) Workflow for calculating the  $\Delta$ MGW for a bi-allelic SNP. This method captures the change in  
804 MGW at the SNP position and +/- 1 base pair. This Euclidean distance captures  $\Delta$ MGW as a  
805 measure of magnitude (in Angstroms).



### A MGW for a bi-allelic (T/C) SNP

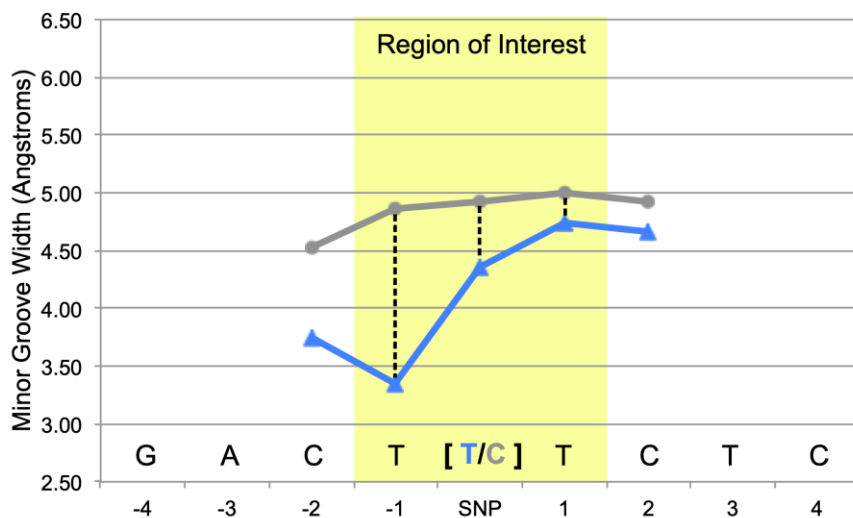

### B Calculation of $\Delta$ MGW for a bi-allelic SNP

| T/C SNP with four flanking nucleotides (+/-)                            | G-A-C-T-[T/C]-T-C-T-C                                                                                                                                                                                                      |      |     |     |      |      |      |      |      |      |
|-------------------------------------------------------------------------|----------------------------------------------------------------------------------------------------------------------------------------------------------------------------------------------------------------------------|------|-----|-----|------|------|------|------|------|------|
| Two unique sequences per bi-allelic SNP                                 | G-A-C-T-C-T-C-T-C<br>G-A-C-T-T-T-C-T-C                                                                                                                                                                                     |      |     |     |      |      |      |      |      |      |
| Generate MGW prediction using DNASHapeR for SNP and +/- 1 bp (k=-1,0,1) | <table border="1"> <thead> <tr> <th>k=-1</th> <th>k=0</th> <th>k=1</th> </tr> </thead> <tbody> <tr> <td>3.35</td> <td>4.36</td> <td>4.74</td> </tr> <tr> <td>4.86</td> <td>4.93</td> <td>5.00</td> </tr> </tbody> </table> | k=-1 | k=0 | k=1 | 3.35 | 4.36 | 4.74 | 4.86 | 4.93 | 5.00 |
| k=-1                                                                    | k=0                                                                                                                                                                                                                        | k=1  |     |     |      |      |      |      |      |      |
| 3.35                                                                    | 4.36                                                                                                                                                                                                                       | 4.74 |     |     |      |      |      |      |      |      |
| 4.86                                                                    | 4.93                                                                                                                                                                                                                       | 5.00 |     |     |      |      |      |      |      |      |
| Calculate Euclidean distance ( $\Delta$ MGW)                            | $\sqrt{\sum_{k=-1}^1 (MGW_k^{\text{allele1}} - MGW_k^{\text{allele2}})^2} = 1.63$                                                                                                                                          |      |     |     |      |      |      |      |      |      |

806

807

808 **Figure 3: Summarization of  $\Delta$ MGW across the complete sample space**

809 (A)  $\Delta$ MGW sample space was constructed on six allele pairings (A/C, A/G, A/T, C/G, C/T, G/T)  
810 with all possible combinations for flanking +/- 4 bp. This yielded 393,216 paired sequences that  
811 were evaluated for  $\Delta$ MGW.

812 (B) The distribution of  $\Delta$ MGW for the 393,216 paired sequences, these summary statistics are  
813 listed in Table 1.

814 (C) Two randomly selected paired sequences from the average and right tail of the  $\Delta$ MGW  
815 distribution are shown. Sequences are plotted with their respective MGW values (Angstroms).  
816  $\Delta$ MGW is calculated as a Euclidean distance, which captures the change in MGW (dashed  
817 lines) at the SNP position and +/- 1bp (highlighted in orange). ATGA[C/A]CGAT exhibits a small  
818  $\Delta$ MGW, at 0.47 Å while TCCA[T/A]ATTG yields a large change in MGW (2.34 Å) which we  
819 would hypothesize to have greater potential for functional consequence if also associated with  
820 disease status.

821 (D) The  $\Delta$ MGW distribution for all paired sequences (gray) is shown superimposed on the  
822  $\Delta$ MGW distributions by 5th nucleotide alleles (blue). Transition pairings (C/T, A/G) have a more  
823 strongly skewed distribution with a smaller average  $\Delta$ MGW compared to transversion pairings  
824 (A/C, A/T, C/G, G/T), (Table 1). Pairings that represent complimentary sequences (C/T – A/G  
825 and A/C – T/G) exhibit the same distributions of  $\Delta$ MGW, as expected.

826

**A** Generation of all possible sequence pairings (with +/- 4 bp) **C**

| Sequence combinations by paired alleles                 | Total  |
|---------------------------------------------------------|--------|
| (4) - (4) - (4) - (4) - [A/C] - (4) - (4) - (4) - (4) = | 65,536 |
| (4) - (4) - (4) - (4) - [A/G] - (4) - (4) - (4) - (4) = | 65,536 |
| (4) - (4) - (4) - (4) - [A/T] - (4) - (4) - (4) - (4) = | 65,536 |
| (4) - (4) - (4) - (4) - [C/G] - (4) - (4) - (4) - (4) = | 65,536 |
| (4) - (4) - (4) - (4) - [C/T] - (4) - (4) - (4) - (4) = | 65,536 |
| (4) - (4) - (4) - (4) - [G/T] - (4) - (4) - (4) - (4) = | 65,536 |
| Total=393,216                                           |        |

**B** Distribution of  $\Delta$ MGW across complete sample space

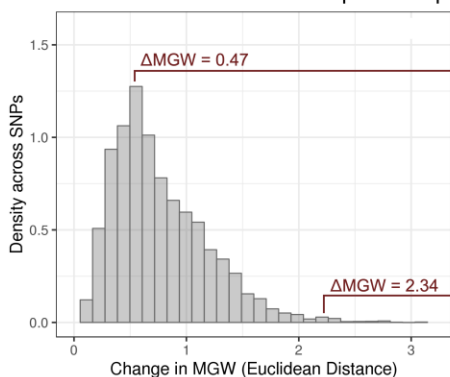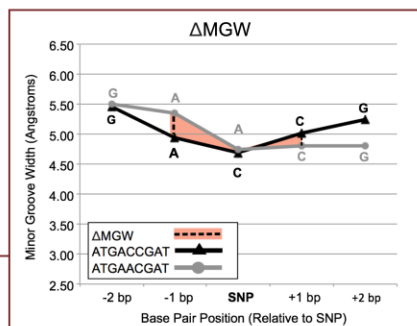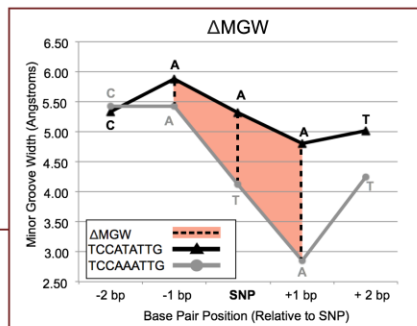

**D** Transition Pairings (Purine/Purine or Pyrimidine/Pyrimidine)

Transversion Pairings (Purine/Pyrimidine)

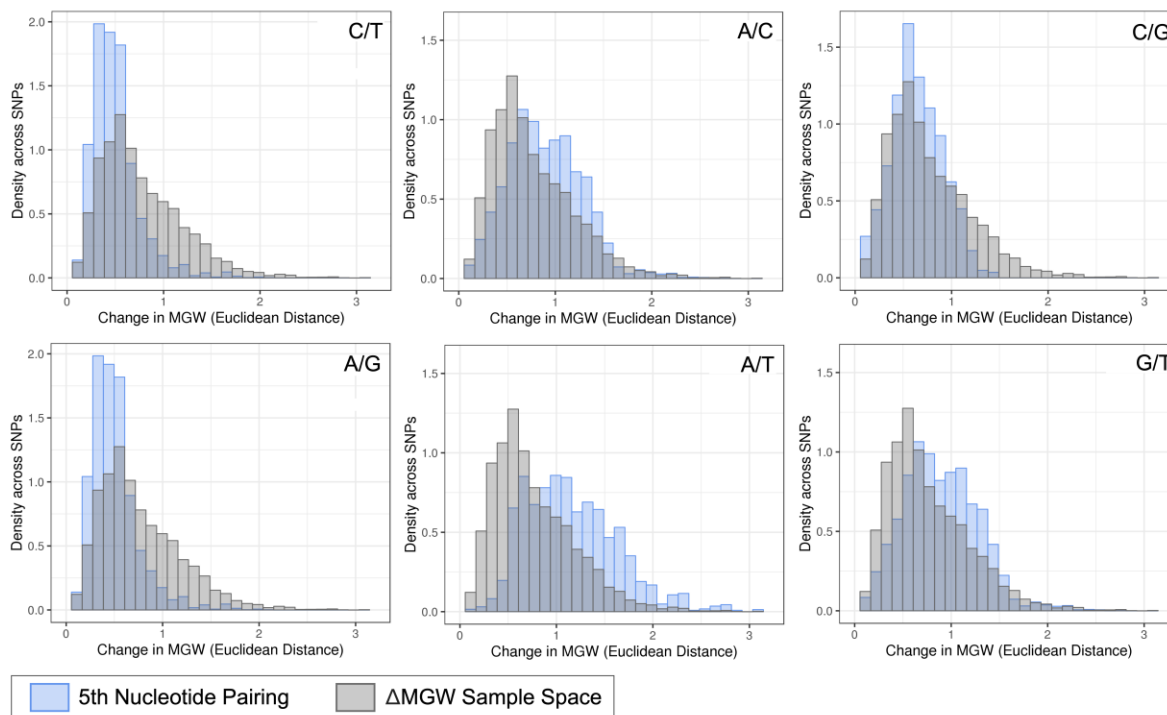

827

828

829 **Figure 4: Summarization of  $\Delta$ MGW across the human genome using bi-allelic SNPs from**  
830 **dbSNP SNP150.**

831 (A) Comparison of  $\Delta$ MGW sample space (Figure 3) and the observed  $\Delta$ MGW from SNPs across  
832 the genome (via dbSNP). Distribution of  $\Delta$ MGW is shown in blue for observed bi-allelic SNPs  
833 from the SNP150 dataset (n=199,038,197 SNPs). The  $\Delta$ MGW sample space distribution (Figure  
834 3) is plotted in gray (n=393,216 paired sequences). The observed  $\Delta$ MGW across genomic  
835 SNPs showed a stronger right skewed distribution than what would be expected from a random  
836 sampling of the entire sample space of all-possible sequences. Only small numbers of SNPs  
837 elicit large magnitudes of  $\Delta$ MGW.

838 (B)  $\Delta$ MGW distributions are similarly shown for SNP subsets, by NCBI function (exclusive NCBI  
839 function label for each SNP, see Methods and Materials). Again, each distribution is  
840 superimposed with the distribution from the  $\Delta$ MGW sample space (shown in gray). Subsetting  
841 by NCBI function yields similar patterns observed in part A, with observed genomic SNPs  
842 showing smaller averages in  $\Delta$ MGW. Some NCBI SNP-functions have specific sequence  
843 requirements (Supplemental Table 1) and these are reflected in the resulting  $\Delta$ MGW  
844 distributions which are also sequence-dependent (e.g. splice-6, nonsense).

845 (C) The mean and median  $\Delta$ MGW for each SNP category. All dbSNP SNP categories have  
846 significantly lower mean and median compared to the  $\Delta$ MGW sample space (Tables 1-2).  
847 Coding-synonymous SNPs have the smallest magnitudes of  $\Delta$ MGW, compared to all other  
848 categories.

849

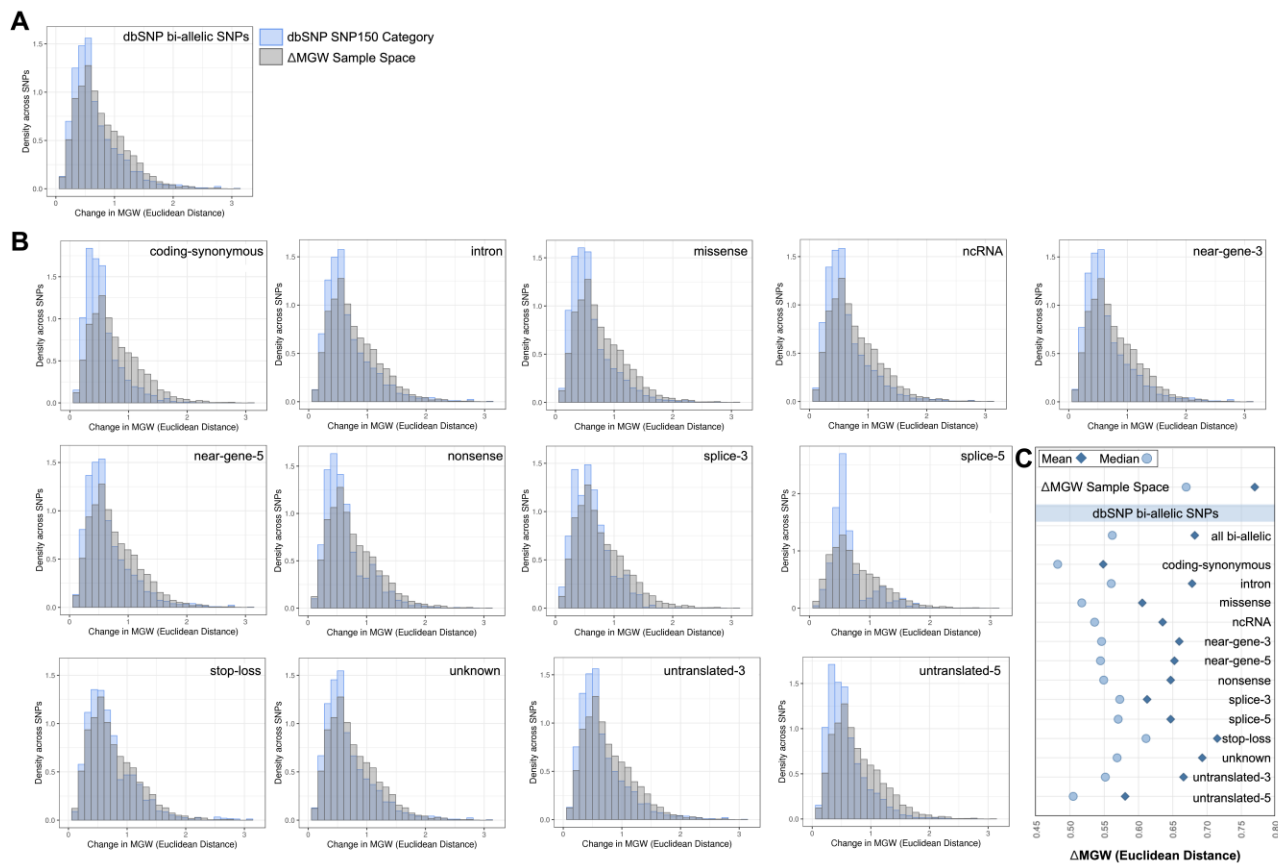

850

851

852

853 **Figure 5: *FAM167A-BLK*  $\Delta$ MGW prioritization by Frequentist and Bayesian Methods in**  
854 **European and African Ancestries.**

855 (A) Genotyped SNPs that passed quality control and were within 250kb of the top single-SNP  
856 association analysis in EA and AA data. A 60 kb region capturing the primary peak of  
857 association is highlighted. In both the EA and AA data a cluster of SNPs in high LD yielded the  
858 top association signals.

859 (B) Using SKAT as a  $\Delta$ MGW-weighted frequentist approach, rs2061831 was sharply prioritized  
860 over SNPs in the previously identified LD blocks. While the single-SNP logistic regression  
861 analyses in (A) identified a different top SNP in the EA (rs13277113) and AA (rs2736340) data,  
862 rs2061831 was consistently prioritized as the top SNP in both the EA and AA analyses.  $\Delta$ MGW-  
863 weighting did not yield spurious associations for with SNPs outside the broad 60 kb peak of  
864 association highlighted in yellow.

865 (C) SNPs within the 60 kb association peak were analyze by a Bayesian approach. The  $\Delta$ MGW-  
866 weighted posterior probabilities are plotted. While the majority of SNPs yielded infinitesimal  
867 posterior probabilities, those comprising the 95% derived credible sets are labeled. Akin to the  
868  $\Delta$ MGW-weighted SKAT analyses, rs2061831 was again prioritized in both the EA and the AA  
869 data, with the largest posterior probability.

870 (D) The  $\Delta$ MGW is plotted for each SNP in the 60 kb region. The  $\Delta$ MGW for a SNP is sequence-  
871 specific thus yielding the same values in EA and AA data. Differences between the two plots  
872 result from differences in genotyped SNP lists (i.e. SNPs that are monomorphic in one  
873 population would not be plotted). SNPs identified by the derived  $\Delta$ MGW-weighted credible set  
874 are plotted in yellow. While rs2061831 had a large  $\Delta$ MGW, other SNPs in the region had larger  
875 magnitudes of  $\Delta$ MGW but did not show evidence of SLE-association. This illustrates the 2-  
876 parameter hypothesis of considering a combination of association signal and magnitude of  
877  $\Delta$ MGW. Prioritized SNPs fall upstream of both *FAM167A* and *BLK*.

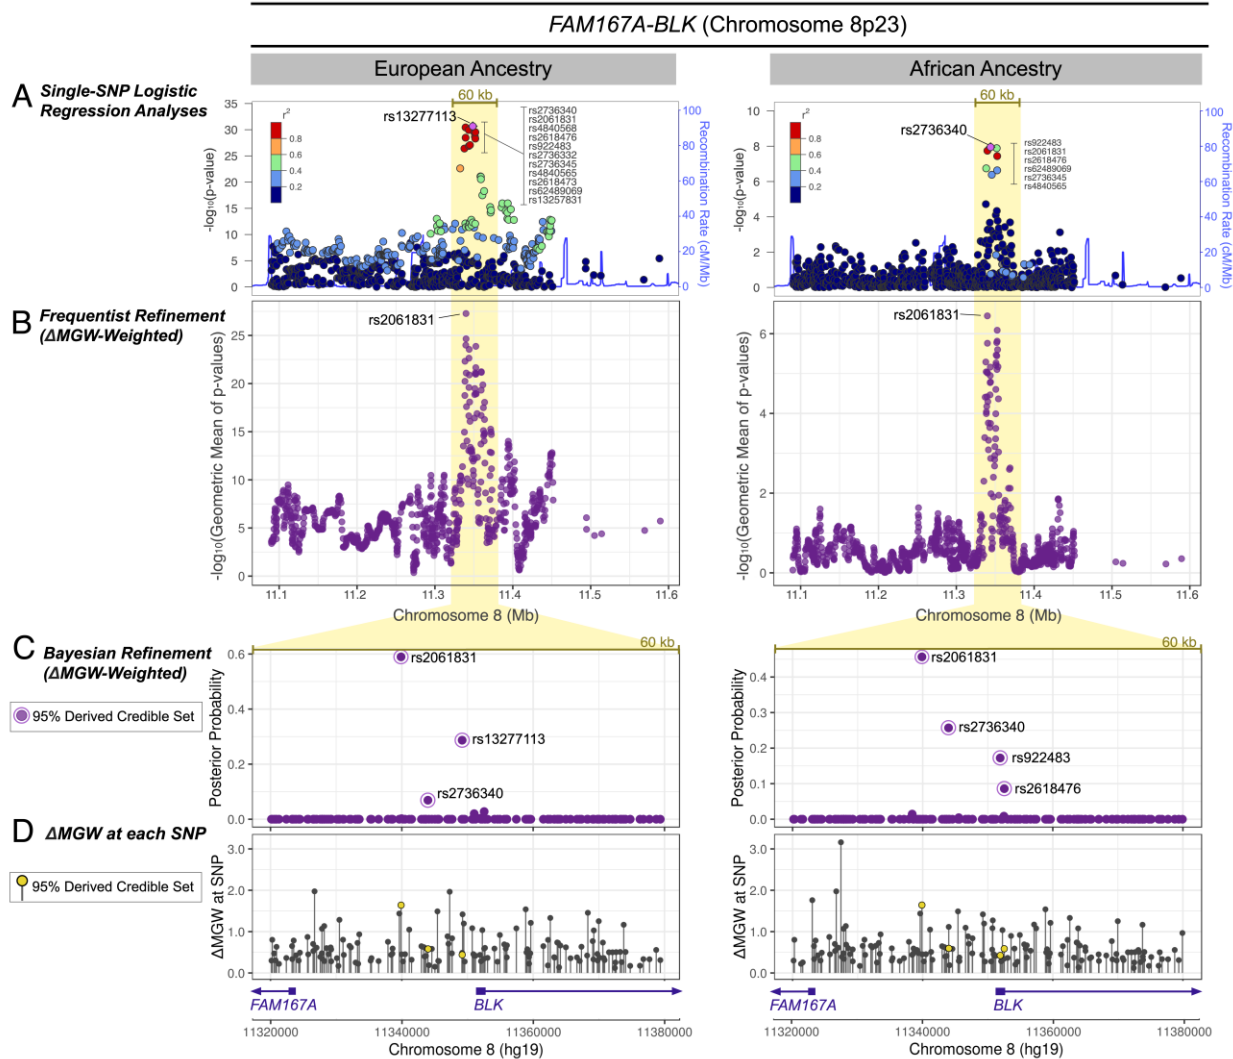

878

879 **Figure 6: STAT4  $\Delta$ MGW prioritization by Frequentist and Bayesian Methods in European**  
880 **and Hispanic Ancestries.**

881 (A) Regional association plots in EA and HA for genotyped SNPs that passed quality control  
882 and were within 250kb of the top single-SNP association analysis in *STAT4*. Within the broad 11  
883 Mb peak of association (highlighted in yellow), a cluster of SNPs in high LD yielded the top  
884 association values.

885 (B) SNP refinement using SKAT with a  $\Delta$ MGW-weighted approach sharply prioritizes  
886 rs11889341 in both EA and HA data. In the EA data, the  $\Delta$ MGW-weighting shifted the top signal  
887 to rs1188931, whereas in the HA data, it simply further accentuated the signal above other  
888 SNPs.

889 (C) For the highlighted 11 Mb region, SNP posterior probabilities are plotted for the derived,  
890  $\Delta$ MGW-weighted Bayesian analysis. While the frequentist MGW-weighted approach prioritized  
891 the same SNP (rs1188931) in both ancestries, this was not observed in the Bayesian approach.  
892 In the EA data, the Bayes factor for rs7568275 ( $BF=2.20 \times 10^{64}$ ) was at such a large magnitude,  
893 that it was largely unaffected by  $\Delta$ MGW-weighting. However, rs1188931 still entered the 95%  
894 derived credible set, but with a much smaller posterior probability (6.03%) compared to  
895 rs7568275 (77.25%). In the HA data,  $\Delta$ MGW-weighting further prioritized rs1188931.

896 (D) The  $\Delta$ MGW for SNPs within the 11 Mb region. SNPs that were identified by the derived  
897  $\Delta$ MGW-weighted credible set are plotted in yellow. Again, the analytic approaches consider  
898 SNPs in the context of a 2-parameter hypothesis, evaluating SNPs for a combination of  
899 association signal and magnitude of  $\Delta$ MGW. Hence, the prioritized SNPs (yellow) are not  
900 necessarily the SNPs with the largest  $\Delta$ MGW in the region. Prioritized SNPs occur within an  
901 intron of *STAT4*.

902



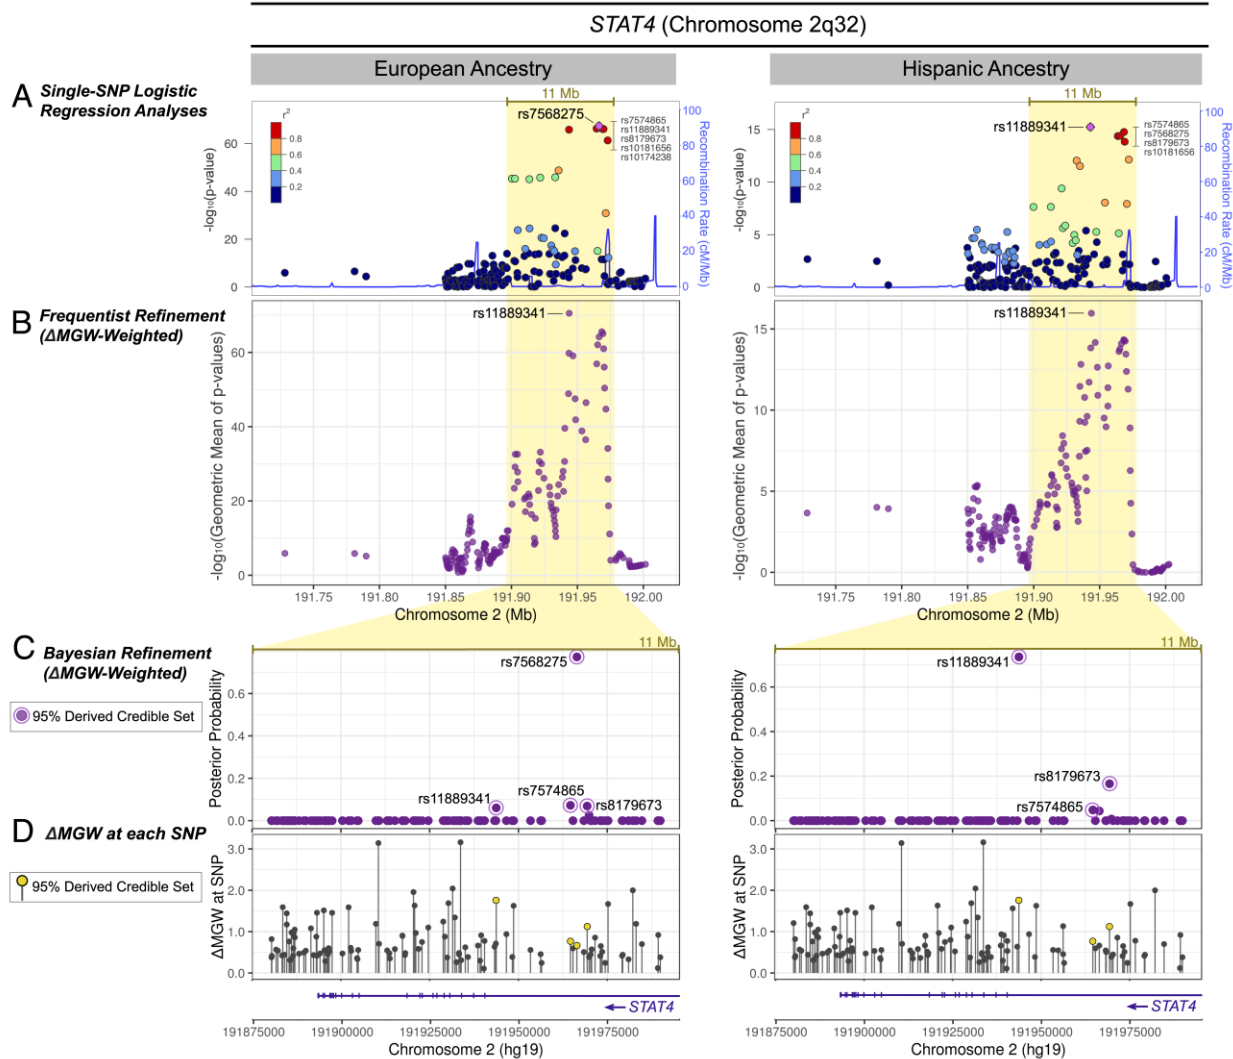

903

904 **Figure 7: *TNIP1*  $\Delta$ MGW prioritization by Frequentist and Bayesian Methods in European**  
905 **and Hispanic Ancestries.**

906 (A) Genotyped SNPs within 250 kb of the top single-SNP association analysis are shown for EA  
907 and HA. The 40 kb region that captures the primary peak of association is highlighted in yellow.  
908 In EA and HA, the same three SNPs (rs10036748, rs6889239, and rs960709) show the highest  
909 association values and are all in high LD. In EA rs6889239 has the best p-value and  
910 rs10036748 yields the best p-value in HA.

911 (B) Analyzing the region with SKAT in a  $\Delta$ MGW-weighted approach. In this region, for these  
912 SNPs, including  $\Delta$ MGW did not provide differential prioritization, rs6889239 remained the top  
913 signal for EA and rs10036748 for HA.

914 (C) For each SNP in the 40 kb region, the posterior probabilities are plotted for the derived,  
915  $\Delta$ MGW-weighted Bayesian analysis. The weighted Bayesian analysis did not alter the relative  
916 signals observed in the single-SNP logistic regression analyses. In the EA data, rs6889239  
917 yielded the largest posterior probability in EA and rs10036748 remained the top signal for HA.

918 (D) The  $\Delta$ MGW is plotted for each genotyped SNP that passed quality control measures. SNPs  
919 that were identified by the derived  $\Delta$ MGW-weighted credible set are plotted in yellow. These  
920 prioritized SNPs have comparatively low magnitudes of  $\Delta$ MGW, indicating that the driving factor  
921 of these SNP prioritizations stemmed from their SLE associations and not their magnitude of  
922  $\Delta$ MGW.

923

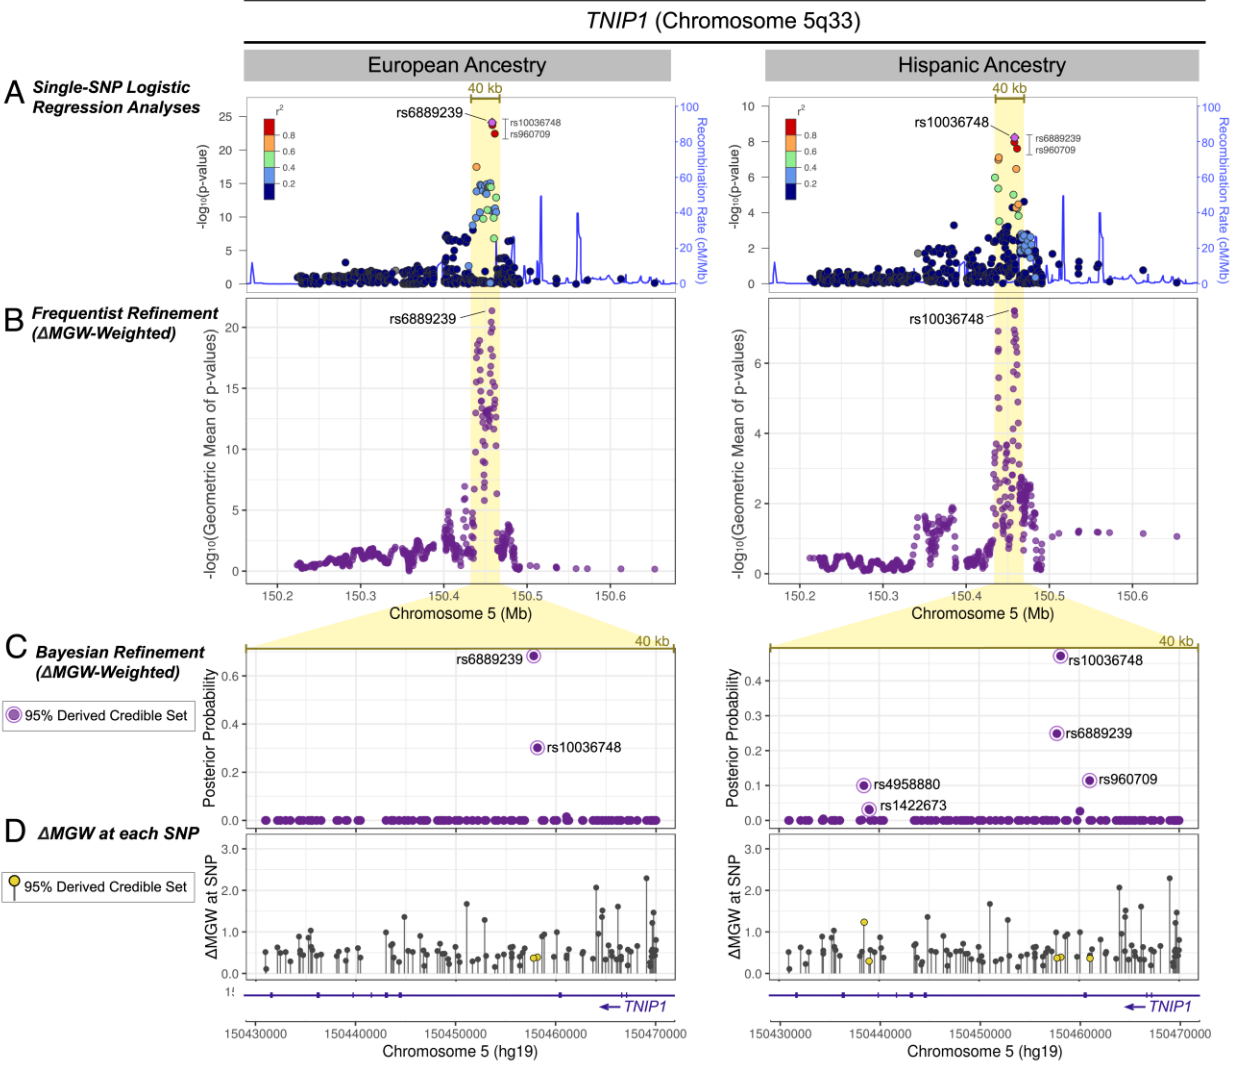

924

925

926 **Primary Tables**

927 **Table 1. Summary statistics for the complete  $\Delta$ MGW ( $\text{\AA}$ ) sample space.**

| 5 <sup>th</sup> Nucleotide pairing <sup>a</sup> | N       | Min. | Max. | Range | Median | Mean | Standard Deviation |
|-------------------------------------------------|---------|------|------|-------|--------|------|--------------------|
| A/C                                             | 65,536  | 0.03 | 2.74 | 2.71  | 0.86   | 0.90 | 0.39               |
| A/G                                             | 65,536  | 0.05 | 2.07 | 2.02  | 0.46   | 0.50 | 0.25               |
| A/T                                             | 65,536  | 0.07 | 3.16 | 3.09  | 1.11   | 1.16 | 0.48               |
| C/G                                             | 65,536  | 0.00 | 1.44 | 1.44  | 0.62   | 0.64 | 0.27               |
| C/T                                             | 65,536  | 0.05 | 2.07 | 2.02  | 0.46   | 0.50 | 0.25               |
| G/T                                             | 65,536  | 0.03 | 2.74 | 2.71  | 0.86   | 0.90 | 0.39               |
| All Possible                                    | 393,216 | 0.00 | 3.16 | 3.16  | 0.67   | 0.77 | 0.42               |

928 <sup>a</sup>Pairings generated by 5<sup>th</sup> nucleotide in 9-mer sequence, all other nucleotides held constant.

929

930 **Table 2. Summary Statistics for  $\Delta$ MGW ( $\text{\AA}$ ) across bi-allelic SNPs in dbSNP SNP150 dataset.**

| SNP Category                 | N                 | Min.       | Max. | Range | Median | Mean | Standard Deviation |      |
|------------------------------|-------------------|------------|------|-------|--------|------|--------------------|------|
| dbSNP SNP150 (bi-allelic)    | 199,038,197       | 0.00       | 3.16 | 3.16  | 0.56   | 0.68 | 0.43               |      |
| Single-NCBI Function Subsets | coding-synonymous | 1,178,980  | 0.00 | 2.58  | 2.58   | 0.48 | 0.55               | 0.30 |
|                              | intron            | 84,909,115 | 0.00 | 3.16  | 3.16   | 0.56 | 0.68               | 0.42 |
|                              | missense          | 2,345,831  | 0.00 | 3.16  | 3.16   | 0.52 | 0.61               | 0.36 |
|                              | ncRNA             | 499,593    | 0.00 | 3.16  | 3.16   | 0.54 | 0.63               | 0.38 |
|                              | near-gene-3       | 654,589    | 0.00 | 3.16  | 3.16   | 0.55 | 0.66               | 0.41 |
|                              | near-gene-5       | 2,487,192  | 0.00 | 3.16  | 3.16   | 0.54 | 0.65               | 0.41 |
|                              | nonsense          | 66,275     | 0.00 | 3.16  | 3.16   | 0.55 | 0.65               | 0.37 |
|                              | splice-3          | 25,401     | 0.01 | 2.07  | 2.05   | 0.57 | 0.61               | 0.31 |
|                              | splice-5          | 28,983     | 0.00 | 2.74  | 2.74   | 0.57 | 0.65               | 0.31 |
|                              | stop-loss         | 2,225      | 0.03 | 3.16  | 3.13   | 0.61 | 0.71               | 0.42 |
|                              | unknown           | 99,004,130 | 0.00 | 3.16  | 3.16   | 0.57 | 0.69               | 0.43 |
|                              | untranslated-3    | 1,299,685  | 0.00 | 3.16  | 3.16   | 0.55 | 0.67               | 0.41 |
|                              | untranslated-5    | 181,208    | 0.00 | 3.16  | 3.16   | 0.50 | 0.58               | 0.33 |

931
